# Peripheral Neuronal Activation Shapes the Microbiome and Alters Gut Physiology

Jessica A. Griffiths<sup>1,2+</sup>, Bryan B. Yoo<sup>1+</sup>, Peter Thuy-Boun<sup>3++</sup>, Victor Cantu<sup>4++</sup>, Kelly Weldon<sup>5,6,++</sup>, Collin Challis<sup>1</sup>, Michael J. Sweredoski<sup>1</sup>, Ken Y. Chan<sup>1,%</sup>, Taren M. Thron<sup>1</sup>, Gil Sharon<sup>1</sup>, Annie Moradian<sup>1,%%</sup>, Gregory Humphrey<sup>4</sup>, Qiyun Zhu<sup>4,%%%</sup>, Justin Shaffer<sup>4,%%%%</sup>, Dennis W. Wolan<sup>3</sup>, Pieter C. Dorrestein<sup>4,5,6</sup>, Rob Knight<sup>4,6,7,8,9</sup>, Viviana Gradinaru<sup>1,2</sup>, and Sarkis K. Mazmanian<sup>1,2\*</sup>

<sup>1</sup>Division of Biology & Biological Engineering, California Institute of Technology, Pasadena, California, USA, 91125

<sup>2</sup>Aligning Science Across Parkinson's (ASAP) Collaborative Research Network, Chevy Chase, MD, 20815

<sup>3</sup>Departments of Molecular Medicine and Integrative Structural and Computational Biology, The Scripps Research Institute, 10550 North Torrey Pines Road, La Jolla, CA 92037, USA

<sup>4</sup>Department of Pediatrics, University of California San Diego, San Diego, CA, USA

<sup>5</sup>Collaborative Mass Spectrometry Innovation Center, Skaggs School of Pharmacy and Pharmaceutical Sciences, University of California San Diego, San Diego, CA, USA

<sup>6</sup>UCSD Center for Microbiome Innovation, University of California San Diego, San Diego, CA, USA

<sup>7</sup>Department of Computer Science and Engineering, University of California San Diego, San Diego, CA, USA

<sup>8</sup>Shu Chien-Gene Lay Department of Engineering, University of California San Diego, San Diego, CA, USA

<sup>9</sup>Halicioğlu Data Science Institute, University of California San Diego, San Diego, CA, USA

+These authors contributed equally

++These authors contributed equally

%Present Address: Stanley Center for Psychiatric Research, Broad Institute, Massachusetts Institute of Technology, Cambridge, MA, 02142

%%Present Address: Precision Biomarker Labs, Cedars-Sinai, 8700 Beverly Blvd. Davis 2904, Los Angeles, CA 90048

%%%Present Address: School of Life Sciences, Arizona State University, AZ 85281

%%%%Present Address: Department of Biology, College of Science and Mathematics, Fresno, CA 93740

\*Lead Contact: Sarkis Mazmanian. Email: [sarkis@caltech.edu](mailto:sarkis@caltech.edu) (S.K.M)

ORCIDs: 0000-0002-5586-1567 (J.A.G.); 0000-0001-5868-348X (V.G.); 0000-0003-2713-1513 (S.K.M.)

33 **SUMMARY**

34 The gastrointestinal (GI) tract is extensively innervated by intrinsic neurons of the enteric  
35 nervous system (ENS) and extrinsic neurons of the central nervous system and peripheral  
36 ganglia, which together regulate gut physiology. The GI tract also harbors a diverse microbiome,  
37 but interactions between the ENS and the microbiome remain poorly understood. Herein, we  
38 activate choline acetyltransferase (ChAT)-expressing or tyrosine hydroxylase (TH)-expressing  
39 gut-associated neurons in mice to determine effects on intestinal microbial communities and  
40 their metabolites, as well as on host physiology. The resulting multi-omics datasets support  
41 broad roles for discrete peripheral neuronal subtypes in shaping microbiome structure, including  
42 modulating bile acid profiles and fungal colonization. Physiologically, activation of either ChAT<sup>+</sup>  
43 or TH<sup>+</sup> neurons increases fecal output, while only ChAT<sup>+</sup> activation results in increased colonic  
44 migrating motor complexes and diarrhea-like fluid secretion. These findings suggest that  
45 specific subsets of peripherally-activated ENS neurons differentially regulate the gut microbiome  
46 and GI physiology in mice, without involvement of signals from the brain.

## 47 **INTRODUCTION**

48 Diverse cell types in the gastrointestinal (GI) tract coordinate physiology within the gut<sup>1</sup> and  
49 throughout the body<sup>2</sup>. The mammalian gut receives and transmits neuronal signals through  
50 ~100,000 extrinsic nerve fibers originating from the sympathetic, parasympathetic, and sensory  
51 nervous systems<sup>3</sup>. The GI tract is also innervated by an extensive network of over 100 million  
52 intrinsic neurons organized into two distinct compartments within the GI tract, namely the  
53 myenteric plexus and submucosal plexus<sup>4</sup>. The neurons of the GI tract, composing the enteric  
54 nervous system (ENS), have been implicated in processes including digestion<sup>5</sup>, immunity<sup>6,7</sup>, and  
55 even complex behaviors<sup>8</sup>, in mice. Interactions between neurons of the GI tract and other cell  
56 types highlight the diverse roles of the ENS. For example, neuronal pathways in the gut regulate  
57 nutrient sensation through intestinal enteroendocrine cells<sup>9</sup>, modulate the epithelial barrier and  
58 mucosal immunity<sup>10-12</sup>, and dynamically interface with the microbiome<sup>13,14</sup>. Exposure of the ENS  
59 to changing diet, microbiome, and xenobiotics creates inputs distinct from those in the central  
60 nervous system (CNS), i.e., the brain and spinal cord.

61  
62 Choline acetyltransferase (ChAT) and tyrosine hydroxylase (TH) are the rate-limiting enzymes  
63 in acetylcholine and catecholamine biosynthesis, respectively, and are key chemical mediators  
64 of neurotransmission in the brain and the periphery. Acetylcholine is the primary excitatory  
65 neurotransmitter of the gut, and cholinergic neurons represent 60% of the ENS, mediating  
66 intestinal propulsion and secretion<sup>15,16</sup>. Several studies have established correlations between  
67 neuronal activity, abundance, and specific physiological outcomes<sup>17-19</sup>. For example, age-  
68 associated reduction of ChAT<sup>+</sup> neurons in the ENS coincides with constipation and evacuation  
69 disorders<sup>20,21</sup>, and clinical studies have shown that anticholinergic drugs cause constipation and  
70 cholinergic agonists can cause diarrhea<sup>22,23</sup>. In a disease context, cholera toxin induces  
71 hypersecretion and sustained activation of submucosal ChAT<sup>+</sup> neurons in mice<sup>24,25</sup>. Although  
72 less characterized, TH<sup>+</sup> neurons and dopamine signaling pathways have also been shown to  
73 affect GI motility<sup>26</sup>, and TH<sup>+</sup> neuronal damage in individuals with Parkinson's disease (PD)  
74 correlates with increased constipation<sup>27,28</sup>.

75  
76 Though known to be important for motility and secretomotor function, ChAT<sup>+</sup> and TH<sup>+</sup> neurons  
77 have not yet been systematically characterized and interrogated for their roles in GI  
78 physiology<sup>17,29</sup>. One barrier to modulation of neuronal populations in the ENS is its size: 35-40  
79 cm in mice. To circumvent the need for direct delivery of effectors, we leveraged a systemically-  
80 delivered engineered adeno-associated virus (AAV) with enhanced tropism for the ENS and

81 other peripheral ganglia of mice<sup>30</sup>. Importantly, this vector, AAV-PHP.S, does not transduce the  
82 CNS, allowing us to uncouple peripheral activation from brain-to-gut signaling. We find that  
83 activating gut-associated ChAT<sup>+</sup> and TH<sup>+</sup> neurons of mice with chemogenetic modulators<sup>31</sup>  
84 alters the transcriptional and proteomic landscape of the intestines, as well as the gut  
85 metagenome and metabolome. Multi-‘omic’ analyses allow us to characterize detailed and  
86 complex host-microbial interactions, and enable prediction of neuronal influences on a number  
87 of biological processes in the gut, including providing insights into secondary bile acid  
88 production and control of fungal populations, among other interesting associations. In addition,  
89 we show that activation of gut-associated neurons strikingly impacts GI function, including  
90 motility and fluid secretion. Together, this work reveals differential effects of non-brain activation  
91 of ChAT<sup>+</sup> and TH<sup>+</sup> neurons in shaping the gut environment and GI physiology and generates  
92 rich datasets as a resource for further exploration (DOI:10.5281/zenodo.10525220,  
93 [https://github.com/mazmanianlab/Griffiths\\_Yoo\\_et\\_al/](https://github.com/mazmanianlab/Griffiths_Yoo_et_al/)).

94

## 95 **RESULTS**

### 96 **Distinct spatial localization of ChAT<sup>+</sup> and TH<sup>+</sup> neurons in the ENS**

97 Broad ENS morphology has been previously characterized using immunohistochemistry  
98 (IHC)<sup>21,32,33</sup>. To map neurons in mice with higher resolution, we used recombinant AAVs to  
99 fluorescently label enteric neurons *in vivo*, and tissue clearing techniques to enhance  
100 visualization of intact GI tissue<sup>34–36</sup>. Imaging whole tissue, without the need for sectioning,  
101 preserves neuronal architectures over large distances and across both longitudinal and cross-  
102 sectional axes. The AAV capsid variant AAV-PHP.S is optimized for systemic delivery in mice<sup>37</sup>  
103 and displays increased tropism for the peripheral nervous system (PNS), including the ENS<sup>38</sup>.  
104 To further optimize ENS expression, we replaced the CAG promoter used in<sup>30</sup> with the human  
105 Synapsin 1 (hSYN1) promoter, which has been shown to restrict gene expression to neurons<sup>38</sup>  
106 and minimize expression in peripheral targets such as the dorsal root ganglia (DRGs)<sup>39</sup>. To  
107 assess off-target effects, we compared expression of AAV-PHP.S-delivered hSYN1-  
108 mNeonGreen to that of CAG-mNeonGreen in various non-ENS tissues known to affect GI  
109 function (Figure S1). Expression from the hSYN1 construct only sparsely labeled the DRGs and  
110 jugular-nodose ganglia, and did not label neuronal projections in the vagus nerve or dorsal root,  
111 unlike the previously-used CAG construct (Figures S2A and S2B)<sup>30</sup>. In the CNS, AAV-PHP.S-  
112 hSYN1 did not label neurons in the brain, brainstem, or spinal cord (Figure S3).

113



114 We packaged genes encoding fluorescent proteins (tdTomato or mNeonGreen) under control of  
115 the hSYN1 promoter into AAV-PHP.S, delivered them systemically, and found that 90% ( $\pm 2.6\%$   
116 SD) of ENS cells labelled with antibodies against Protein Gene Product 9.5 (PGP9.5), a pan-  
117 neuronal protein, co-localized with virally-labelled neurons in the small intestine (SI) and colon  
118 (Figure 1A). A single systemic injection of AAV-PHP.S-hSYN1-mNeonGreen at a dose of  $10^{12}$   
119 viral genomes (vg) was sufficient to label spatially diverse regions of the ENS, such as ganglia  
120 proximal and distal to the mesentery (Figure S4A). Viral transduction was uniform throughout  
121 the SI and colon, aside from a small ( $\sim 1.5$  cm) section of the medial colon that, for unknown  
122 reasons, was consistently not well transduced and was therefore excluded from further analysis  
123 (Figure S4B).

124

125 To explore the general architecture of the ENS, we transduced wild-type mice with a single i.v.  
126 injection of a pool of AAV-PHP.S packaging multiple fluorescent proteins (AAV-PHP.S-hSYN1-  
127 XFP), which broadly labelled enteric neurons in the gut and enabled us to distinguish cells by  
128 distinct colors resulting from stochastic transduction with different combinations of XFPs (Figure  
129 1B). We quantified the number of neurons and ganglia, as well as the ganglion size (i.e., the  
130 number of neurons in each ganglion) in the myenteric and submucosal plexuses of seven  
131 regions of the SI and two regions of the colon (Figures S5A-S5F). Regions were approximately  
132 1 cm in length and the tissue was sampled every 2-3 cm. We saw that in the SI, the numbers of  
133 neurons and ganglia generally increased toward the distal portion of the myenteric plexus, while  
134 the converse was true for the submucosal plexus (i.e., lower numbers in distal than proximal  
135 regions) (Figures S5A and S5B). Additionally, the size of the ganglia (i.e., the number of  
136 neurons per ganglion) increased in the distal region of the SI myenteric plexus, a feature not  
137 observed in the submucosal plexus (Figure S5C). While neuronal numbers were similar in the  
138 proximal and distal regions of the colonic plexuses (Figure S5D), the number of myenteric  
139 ganglia increased (Figure S5E) while the size of each ganglion decreased in the distal colon  
140 (Figure S5F). Interestingly, submucosal neurons in the proximal colon localized to natural folds  
141 in the tissue (Figure 1B, dashed lines in lower second-from-right panel).

142

143 To visualize ChAT<sup>+</sup> and TH<sup>+</sup> neurons, we employed mouse lines in which Cre recombinase  
144 (Cre) is expressed under the control of the respective gene promoter and engineered viral  
145 constructs with the transgene in a double-floxed inverted orientation (DIO) so that the transgene  
146 is flipped and expressed in a Cre-dependent manner. After transducing ChAT-Cre or TH-Cre  
147 mice with AAV-PHP.S-hSYN1-DIO-XFP, we observed that both neuronal populations occupy

148 spatially distinct layers of the GI tract, with ChAT<sup>+</sup> neurons primarily located in the myenteric  
149 plexus and TH<sup>+</sup> neurons more abundant in the submucosal plexus (Figure 1C). Quantifying this  
150 effect, we found more ChAT<sup>+</sup> than TH<sup>+</sup> neurons in all assayed regions of the myenteric plexus  
151 (Figure 1D), although the density of TH<sup>+</sup> myenteric neurons increased distally (Figure 1D, 10-  
152 fold increase from SI-1 vs SI-7; 2-fold increase from SI-7 vs SI-10/13/15). In the small intestine,  
153 by contrast, there were more TH<sup>+</sup> than ChAT<sup>+</sup> submucosal neurons (Figure 1E). In addition to  
154 providing these insights into ENS architecture, this approach for whole tissue imaging without  
155 the need for antibody labeling (which has limited penetration to deeper layers) should be  
156 broadly useful for profiling other neuronal and non-neuronal cell types in the gut.

157

### 158 **Activation of gut-associated neurons reshapes the gut microbiome**

159 The unique spatial organization of ChAT<sup>+</sup> and TH<sup>+</sup> neurons we observed suggests potentially  
160 distinct functions, which we decided to investigate through specific activation of each neuronal  
161 population. First, we examined the specificity of AAV-PHP.S-hSYN1 by staining gut-extrinsic  
162 PNS ganglia for TH, and found no transduction of TH<sup>+</sup> cells in the DRGs or jugular-nodose  
163 ganglia (Figures S2B and S2C). ChAT<sup>+</sup> neurons are absent in these peripheral ganglia (Figure  
164 S2C)<sup>40,41</sup>. Prior research has shown that AAV-PHP.S-hSYN1 transduces the prevertebral  
165 sympathetic ganglia, which are known to innervate the gut<sup>42</sup>, but these ganglia also lack ChAT<sup>+</sup>  
166 neurons<sup>43</sup>. In fact, the vast majority of neurons in the prevertebral sympathetic ganglia are TH<sup>+</sup>  
167<sup>43,44</sup>. Therefore, for the remainder of the manuscript, we will use the term “gut-associated” to  
168 refer to ChAT<sup>+</sup> neurons in the ENS, or TH<sup>+</sup> neurons in the ENS plus innervating prevertebral  
169 sympathetic ganglia.

170

171 For cell-specific neuronal activation, we employed a Cre-dependent genetic construct encoding  
172 an activating ‘Designer Receptor Exclusively Activated by Designer Drugs’ (DREADD), named  
173 hM3Dq, which is a modified neurotransmitter receptor designed to induce neuronal activation  
174 when exposed to Compound 21 (C21), a “designer drug” specific to this receptor<sup>45</sup>. We  
175 validated functional gene delivery and expression using intestinal explants from a ChAT-Cre  
176 mouse transduced with the activating DREADD and a construct encoding the calcium sensor  
177 GCaMP6f, observing a gradual increase in fluorescence consistent with a calcium transient  
178 following administration of C21 (Figure S5G and Video Supplement 1).

179

180 We reasoned that neuronal activation in the gut may impact the composition and community  
181 structure of the gut microbiome. Accordingly, we transduced ChAT-Cre or TH-Cre mice with

182 either virus carrying the activating DREADD (AAV-PHP.S-hSYN1-DIO-hM3Dq-mRuby2) or a  
183 control virus expressing only the fluorescent reporter protein (AAV-PHP.S-hSYN1-DIO-  
184 mRuby2). We performed shotgun metagenomics on a longitudinal series of fecal samples  
185 collected prior to and following ChAT<sup>+</sup> or TH<sup>+</sup> neuron activation by C21 (on days 2, 6, and 10 of  
186 C21 administration), as well as contents of the terminal cecum collected on day 10 (Figure 2A).  
187 In ChAT<sup>+</sup>-activated mice, Faith's phylogenetic diversity (i.e., alpha-diversity) decreased  
188 dramatically in the day 10 fecal and cecal samples (Figure 2B), with many microbial taxa less  
189 abundant (Figures 2I-2K; Figure S6; Figure S7). In contrast, TH<sup>+</sup>-activated mice displayed  
190 similar phylogenetic diversity to controls throughout the experiment (Figure 2B). Using weighted  
191 UniFrac distances and principal coordinate analysis (PCoA) to determine the composition of  
192 microbial communities (i.e., beta-diversity), we observed a distinction between ChAT<sup>+</sup>-activated  
193 and control animals in both feces and cecal contents, a shift that was absent in samples from  
194 TH<sup>+</sup>-activated mice and controls (Figures 2C-H). Over the experimental time course,  
195 Verrucomicrobia became significantly enriched in ChAT<sup>+</sup>-activated mice (Figure 2I). To explore  
196 differentially abundant bacterial taxa, we used linear discriminant analysis effect size (LEfSe)<sup>46</sup>  
197 and generated cladograms depicting the phylogenetic relationships of differentially abundant  
198 taxa (Figures 2J-2M). This analysis revealed that the bacterial species *Akkermansia muciniphila*  
199 drove the increase in Verrucomicrobia we observed in ChAT<sup>+</sup>-activated mice (Figures 2N and  
200 2O).

201  
202 In addition to identifying microbial species, metagenomic analysis can reveal gene families and  
203 pathways that are differentially abundant in the microbiome. ChAT<sup>+</sup>-activated mice, but not TH<sup>+</sup>-  
204 activated mice, showed changes in beta-diversity of both gene families and pathways, with  
205 shifts evident in the cecal contents and feces collected 9 days after activation (Figures 2P-2S).  
206 The most distinguishing features were highly represented in the control group and  
207 downregulated in ChAT<sup>+</sup>-activated mice and were mainly associated with bacterial processes,  
208 such as nucleotide biosynthesis and metabolism, and protein translation and transport (Figures  
209 2P-2S; Figures S7C and S7D). This downregulation is consistent with the decrease in bacterial  
210 alpha-diversity we observed in ChAT<sup>+</sup>-activated mice (Figure 2B). We conclude that neuronal  
211 activation actively reshapes the gut microbiome at community, species, and genetic levels, with  
212 considerable differences between the effects of ChAT<sup>+</sup> and TH<sup>+</sup> neurons.

213

214 **Neuronal stimulation impacts the gut metabolome**

215 Given the intimate and intertwined mouse and microbial co-metabolism, the changes in the  
216 microbial metagenome we observed in response to neuronal activation led us to predict that  
217 there would also be alterations in the profile of gut metabolites. We therefore performed  
218 untargeted metabolomics using liquid chromatography with tandem mass spectrometry (LC-  
219 MS/MS) to assay molecular changes in cecal contents and feces following neuronal activation in  
220 the gut. In both ChAT<sup>+</sup>- and TH<sup>+</sup>-activated neurons, compared to unactivated controls (no  
221 DREADD), we observed a strong separation of metabolome profiles in cecal samples taken one  
222 hour following the last C21 injection (Figures 3A and 3B). Thus, targeted activation of ChAT<sup>+</sup>  
223 and TH<sup>+</sup> gut-associated neurons appears to strongly influence the gut metabolome.

224  
225 To contextualize these data, we applied the Global Natural Products Social Molecular  
226 Networking (GNPS) tool<sup>47</sup>, an open-access mass spectrometry repository and analysis pipeline.  
227 GNPS revealed metabolic networks of both annotated and unannotated molecules in the cecal  
228 contents of ChAT<sup>+</sup>-activated and TH<sup>+</sup>-activated mice (Figures 3C and 3D), allowing us to identify  
229 metabolites with differential abundance between control and activated samples. Activation of  
230 TH<sup>+</sup> neurons strongly increased metabolites whose closest spectral matches were linoelaidic  
231 acid (ID: 626), oleanolic acid methyl ester (ID: 378), and coproporphyrin I (ID: 739). Metabolites  
232 that spectrally resembled xanthine (ID: 259), genistein (ID: 846), and trans-ferulic acid (ID: 707)  
233 were decreased upon activation of TH<sup>+</sup> neurons (Table S1).

234  
235 In both ChAT<sup>+</sup>-activated and TH<sup>+</sup>-activated mice, the molecular networks largely consisted of  
236 level 3 annotations (based on the Metabolomics Standards Initiative (MSI)<sup>48</sup>) of compounds  
237 belonging to the bile acid molecular family and their conjugates, as well as unannotated analogs  
238 (Figures 3C-3D). Primary bile acids are chemicals derived from host (mouse) cholesterol  
239 biosynthesis, which are subsequently co-metabolized by gut bacteria into secondary bile  
240 acids<sup>49,50</sup>. Interestingly, metabolites with a closest spectral match to the primary bile acid cholic  
241 acid (IDs: 108, 114, 215, 219, 221, 224, 259) were significantly enriched in the cecum of ChAT<sup>+</sup>-  
242 activated mice (Figures 3D-3F; Table S1). Additional metabolites that spectrally resemble tauro-  
243 conjugated primary bile acids, such as taurocholic acid (IDs: 234, 248) and taurohyocholic acid  
244 (ID: 235), trended upwards. Conversely, features matching the spectra of secondary bile acids  
245 and bile acid metabolites such as ursodeoxycholic acid (ID: 13), deoxycholic acid (ID: 100),  
246 beta-hyodeoxycholic acid (IDs: 1, 143) and 12-ketodeoxycholic acid (IDs: 19, 138) were  
247 decreased in ChAT<sup>+</sup>-activated mice (Figures 3D-3F). These data suggest that activation of  
248 ChAT<sup>+</sup> neurons may modulate, either directly or indirectly, primary bile acid secretion and/or

249 metabolism to secondary bile acids, which have been implicated in a number of metabolic and  
250 immunologic functions, as discussed below.

251

### 252 **Neuronal subpopulations differentially shape the gut luminal proteome**

253 Proteins from the mouse, gut microbes, and diet converge and interact in the GI tract<sup>51</sup>. We  
254 performed untargeted label-free proteomics by LC-MS/MS of cell-free supernatants of the cecal  
255 contents from ChAT<sup>+</sup>-activated and TH<sup>+</sup>-activated mice and controls collected one hour  
256 following the final C21 treatment (see Figure 2A). Consistent with the increase in cecal bile acid  
257 metabolites that we observed in ChAT<sup>+</sup>-activated mice, we report an increased abundance of  
258 Niemann-Pick C1-Like 1 protein (NPC1L1) in the cecum of these mice (Figure 4A). NPC1L1 is  
259 expressed on the apical surface of enterocytes, and is integral to the absorption of free  
260 cholesterol, the precursor of bile acids, from the lumen<sup>52</sup>. Goblet cell-related proteins,  
261 specifically Mucin-19 (MUC19) and Zymogen granule 16 (ZG16), a protein localized to secretory  
262 granules<sup>53</sup>, also trended upwards following ChAT<sup>+</sup> neuronal activation (Figure 4A). Conversely,  
263 one of the most highly downregulated proteins was an aldehyde dehydrogenase (Q3U367)  
264 encoded by the *Aldh9a1* gene, which is involved in the catalytic conversion of putrescine to  
265 gamma-aminobutyric acid (GABA)<sup>54</sup>. While GABA is the primary inhibitory neurotransmitter in  
266 the CNS, little is known about its role in the ENS. The most significantly upregulated proteins in  
267 cecal contents of ChAT<sup>+</sup>-activated mice were pancreatic digestive enzymes including  
268 chymopasin (CTRL), chymotrypsinogen B1 (CTRB1), and pancreatic lipase related protein 2  
269 (PNLIPRP2) (Figure 4A). Accordingly, network analysis of upregulated proteins revealed that  
270 KEGG pathways associated with digestion represent the majority of the network (Figure 4B).  
271 This is consistent with evidence that cholinergic, viscerofugal neurons send signals from the GI  
272 tract to other organs of the digestive system, including the pancreas<sup>4</sup>. Cholinergic innervation of  
273 the pancreas plays a significant role in regulating pancreatic functions, such as the secretion of  
274 digestive enzymes and insulin release<sup>55</sup>.

275

276 Peripheral activation of TH<sup>+</sup> gut-associated neurons also altered the luminal proteome of the  
277 cecum. Notably, 88% (52/59) of the differentially abundant proteins ( $p_{\text{adj.}} < 0.25$ ) were distinct  
278 from those identified in ChAT<sup>+</sup>-activated mice. The overall direction of the effect was also  
279 reversed: ~90% of differentially-abundant cecal proteins in TH<sup>+</sup>-activated mice were upregulated  
280 (53/59), compared to ~18% in ChAT<sup>+</sup>-activated mice (20/112), suggesting that activation of  
281 distinct neuronal subsets is associated with opposing changes in GI function. We observed  
282 signatures of increased protein-protein interactions in cecal contents of TH<sup>+</sup>-activated mice,

283 evidenced by more network nodes and connections (Figure 4D). Filamin B (FLNB) and spectrin  
284 beta chain, non-erythrocytic 1 (SPTBN1) were two of the most significantly enriched proteins  
285 following TH<sup>+</sup> neuron activation (Figure 4C). Both are associated with the intestinal brush border  
286 and membrane vesicles<sup>56,57</sup>. Accordingly, coatomer proteins also trended upward (COPA and  
287 COPB2) (Figure 4C) and vesicle-mediated transport was one of the major protein networks  
288 altered (Figure 4D). Other upregulated protein interaction networks were associated with  
289 metabolic pathways, ribosomal activity, and the immune system (Figure 4D). For example, the  
290 immune-related proteins immunoglobulin heavy constant alpha (IGHA) (in ChAT<sup>+</sup>-activated),  
291 immunoglobulin heavy constant gamma 2C (IGHG2C), and complement component 3 (in TH<sup>+</sup>-  
292 activated) trended upward (Figures 4A and 4C).

293  
294 Perhaps the most intriguing observation was the strong depletion of acidic mammalian chitinase  
295 (CHIA) upon activation of TH<sup>+</sup> neurons (Figure 4C). Chitin is a natural polysaccharide that is a  
296 major component of fungal cell walls<sup>58</sup>, but intestinal chitinases are poorly studied in mice. This  
297 result prompted us to query the pan-proteomic dataset against a microbial protein database,  
298 which revealed that the decrease in CHIA abundance following TH<sup>+</sup> neuron activation was  
299 accompanied by a large bloom in fungal-associated peptides in the microbiome (~59% of  
300 peptides mapped to any microbe) (Figure 4E). In contrast, fungal peptides represented only  
301 ~0.4% of enriched peptides in the lumen of ChAT<sup>+</sup>-activated mice (Figure 4F). Unfortunately, we  
302 were unable to corroborate these proteomic data with metagenomics since the DNA extraction  
303 method we used was not optimized for fungi. However, these findings suggest that the reduced  
304 chitinase production of activated TH<sup>+</sup> cells is directly associated with a dramatic increase in  
305 fungal proteins, which, if experimentally validated in future, would represent a circuit by which  
306 the gut-associated neurons of mice regulates fungal load in the gut.

307

### 308 **Activation of ChAT<sup>+</sup> and TH<sup>+</sup> neurons alters the intestinal transcriptome**

309 Given the changes to the gut microbiome, proteome and metabolome that we observed, we  
310 were interested in the tissue-level impact of neuronal activation on the intestinal transcriptome.  
311 We therefore profiled gene expression with QuantSeq, a quantitative 3' mRNA-sequencing  
312 technology, in 1 cm of tissue from the distal SI and proximal colon harvested one hour after the  
313 last C21 injection. Rapid and transient expression of immediate early genes (IEGs) is widely  
314 used as a measure of increased neuronal activity<sup>59</sup>, and the IEGs *Fos*, *Egr1*, *Jun*, and *Klf2* were  
315 among the most significantly upregulated transcripts we identified in the SI and colon of both  
316 ChAT<sup>+</sup>- and TH<sup>+</sup>-activated mice (Figures 5A-5D). These IEGs are also known to be upregulated



317 during growth and differentiation of highly active cell types such as immune cells<sup>60,61</sup>, smooth  
318 muscle cells<sup>62</sup>, and intestinal epithelial cells<sup>63</sup>.

319

320 In the distal SI, we found similar numbers of differentially-expressed genes (DEGs;  $p_{\text{adj.}} < 0.05$ ) in  
321 ChAT<sup>+</sup>-activated mice (162 DEGs) and TH<sup>+</sup>-activated mice (165 DEGs) (Figures 5A and 5C).  
322 The direction of regulation differed, however, with ~73% of DEGs upregulated upon ChAT<sup>+</sup>  
323 activation (118 up, 44 down) and ~58% of DEGs downregulated upon TH<sup>+</sup> activation (69 up, 96  
324 down). IEGs followed this overall pattern, with 29 upregulated in the distal SI of ChAT<sup>+</sup>-activated  
325 mice but only two upregulated in TH<sup>+</sup>-activated mice (Figure 5E), and three (i.e., *Hbegf*, *Soca3*,  
326 *Mcl1*) downregulated (Figure 5C). Similar proportions of DEGs were upregulated in the proximal  
327 colon of both ChAT<sup>+</sup>-activated (169 up, 84 down) and TH<sup>+</sup>-activated mice (130 up, 62 down)  
328 (Figures 5B and 5D). Given the enrichment in fungal proteins and reduction in the level of the  
329 CHIA protein in the TH<sup>+</sup>-activated mice, we explored potential immune responses to fungi but  
330 found no obvious inflammatory signals compared to control mice (Table S3).

331

332 To gain insight into the cellular functions of DEGs, we used Gene Set Enrichment Analysis  
333 (GSEA) (Figures 5F-I; Table S2). Notably, the most highly enriched gene ontology (GO) term for  
334 the distal SI of ChAT<sup>+</sup>-activated mice was “regulation of smooth muscle cell proliferation” (Figure  
335 5F), whereas in TH<sup>+</sup>-activated mice it was “response to bacteria” (Figure 5H), consistent with  
336 the increase in immune-related responses suggested by our proteomic dataset. In the proximal  
337 colon, we observed similar GO pathways in ChAT<sup>+</sup>-activated and TH<sup>+</sup>-activated mice (Figures  
338 5G and 5I), suggesting that transcriptomic signatures may depend on the context of the  
339 activated neurons. In the SI, ChAT<sup>+</sup> neurons predominantly border muscle cells in the myenteric  
340 plexus, while TH<sup>+</sup> neurons neighbor epithelial and immune cells which respond to bacteria in the  
341 submucosal plexus of the distal SI (see Figures 1C-1E). In the colon, both neuronal subsets are  
342 abundant in the myenteric plexus (see Figure 1D). In both myenteric and submucosal plexuses,  
343 we saw a wider breadth of pathways upregulated by activation of ChAT<sup>+</sup> neurons than TH<sup>+</sup>  
344 neurons, with ChAT<sup>+</sup> neuronal activation impacting diverse cellular functions in the GI tract,  
345 involving endothelial, epithelial, immune, and adipose cells (Figure 5G; Table S2).

346

### 347 **Differential functional GI outcomes of activation of ChAT<sup>+</sup> and TH<sup>+</sup> neurons**

348 Motivated by the complexity of responses we observed following activation of neuronal  
349 populations in the gut, we decided to assay functional GI outcomes. Both ChAT<sup>+</sup> and TH<sup>+</sup>  
350 neuronal populations are known to be important for motility and secretory function<sup>29,64</sup>, but they

351 have never been specifically modulated to study GI physiology in a freely behaving mammal.  
352 Activation of either ChAT<sup>+</sup> or TH<sup>+</sup> gut-associated neurons resulted in faster whole gut transit  
353 time, increased fecal pellet output, and mass of cecal contents compared to control mice  
354 (Figures 6A-C). Fecal pellets from ChAT<sup>+</sup>-activated, but not TH<sup>+</sup>-activated, mice had increased  
355 water content, which is consistent with reports in the literature of involvement of ChAT<sup>+</sup> enteric  
356 neurons in fluid secretion (Figures 6D-6F)<sup>15,23,24</sup>. This distinction is particularly notable given the  
357 higher concentration of TH<sup>+</sup> neurons than ChAT<sup>+</sup> neurons in most regions of the submucosal  
358 plexus (see Figure 1), which is largely responsible for fluid secretion and absorption<sup>1</sup>. Daily  
359 administration of C21 for 9 days to control mice (no DREADD) did not cause any obvious health  
360 impairment and the mice maintained body weight throughout the experimental period (Figures  
361 S6C and S6D). TH<sup>+</sup>-activated mice also maintained body weight, but ChAT<sup>+</sup>-activated animals  
362 experienced slight weight loss that likely reflects the diarrhea-like phenotype over 9 consecutive  
363 days. To further examine gut motility in the absence of extrinsic innervation, we analyzed  
364 propulsive colonic migrating motor complexes (CMMCs) in an *ex vivo* system. Activation of  
365 ChAT<sup>+</sup> neurons by C21 administration resulted in more frequent migration of motor complexes  
366 (Figures 6G, 6I, and 6J; Table S4), whereas activation of TH<sup>+</sup> neurons had no effect on CMMCs  
367 (Figure 6H; Table S4). The discrepancy between the *in vivo* and *ex vivo* results we observed  
368 may be due to activation of TH<sup>+</sup> neurons in the sympathetic prevertebral ganglia that project to  
369 the gut<sup>32</sup>. Overall, these data reveal that ChAT<sup>+</sup>, but not TH<sup>+</sup>, neurons in the gut mediate  
370 intestinal fluid balance and *ex vivo* colonic motility.

371

## 372 **DISCUSSION**

373 While early pioneers of neuroscience in the 20<sup>th</sup> century focused on the ENS as a model, more  
374 recent research has centered on the brain, and our understanding of the CNS has outpaced that  
375 of other neuronal systems in the body. As a result, basic knowledge of many aspects of  
376 neuronal architecture and function within the gut remain rudimentary<sup>20,65,66</sup>. Here, using a viral  
377 delivery system with enhanced tropism for the ENS, we mapped the distribution of ChAT<sup>+</sup> and  
378 TH<sup>+</sup> neurons across the mouse GI tract and assayed the complex effects of their peripheral  
379 activation on physiology and function. Although the DREADD-based activation paradigm we use  
380 in this study is inherently artificial, the results reveal strikingly different roles for neuronal  
381 populations, with nearly every feature characterized (spatial distribution, metagenomic,  
382 metabolic, transcriptional, and proteomic profiles, and even physiological output) unique to cell  
383 type.

384



385 The viral vector we used, AAV-PHP.S, can transduce other neuronal subtypes in the PNS such  
386 as those in the DRGs and, with a strong ubiquitous promoter, induce transgene expression<sup>30</sup>.  
387 To limit this off-target effect, we utilized a weaker promoter with increased ENS specificity and  
388 focused our analyses on GI tissue and lumen. By thus excluding most known extrinsic  
389 innervation pathways, we uncover cell-type-specific effects of gut-associated neuronal activation  
390 that are independent of signaling from the brain.

391  
392 Exposure to the external environment charges the intestines with myriad responsibilities  
393 including absorption and digestion of dietary nutrients, exclusion of xenobiotics, protection from  
394 enteric infection, and partnership with the gut microbiome. Deletion of ChAT in enteric neurons  
395 leads to microbiome dysbiosis<sup>67</sup>, and we observed differences in the compositional profile (both  
396 metagenomic and proteomic) of the gut microbiome specific to activation of ChAT<sup>+</sup> neurons.  
397 Notably, we found an expansion of Verrucomicrobia driven by *A. muciniphila*, which has been  
398 implicated in human diseases such as obesity<sup>68,69</sup>, multiple sclerosis<sup>70,71</sup>, and seizures<sup>72</sup>. *A.*  
399 *muciniphila* metabolizes host-derived mucus as a nutrient source<sup>1</sup>, consistent with the increase  
400 in luminal mucin proteins and digestive enzymes we observed in ChAT<sup>+</sup>-activated mice. A  
401 particularly interesting host-microbial interaction emerged from activation of TH<sup>+</sup> cells, which led  
402 to a dramatic decrease in anti-fungal chitinase (CHIA) protein expression and a concomitant  
403 bloom in fungi, suggesting that neuronal circuits can regulate fungal populations in the gut. If  
404 validated, this intriguing host-microbial interaction could have implications for health. Our study  
405 does not, however, reveal the mechanism(s) by which ENS activation reshapes the gut  
406 microbial community structure, which may involve altered colonic motility, changes in mucus  
407 production, modulation of mucosal immune responses, and/or shifts in metabolism and nutrient  
408 availability.

409  
410 The human gut microbiome possesses as much metabolic capacity as the liver; it is therefore  
411 no surprise that changes to both mouse gut physiology and the microbiome have major  
412 influences on the gut metabolome. In a striking example of mutualism, we report widespread  
413 changes to the pool of intestinal bile acids, molecules produced via host-microbial co-  
414 metabolism. Activation of ChAT<sup>+</sup> neurons, but not TH<sup>+</sup> neurons, impacted expression of  
415 NPC1L1, which is involved in cholesterol transport. In mammals, cholesterol is the substrate for  
416 production of primary bile acids, which are then metabolized exclusively by the gut microbiome  
417 into secondary bile acids. Bile acids play critical roles in fat absorption<sup>73</sup>, gut motility<sup>74</sup>, hormonal  
418 signaling<sup>75</sup> and immune functions<sup>76</sup>, and neurological conditions<sup>77</sup>. Expression of bile salt

419 hydrolases and hydratases increases the fitness of both commensal and pathogenic bacteria<sup>78–</sup>  
420 <sup>82</sup>. While additional work is required to determine how the ENS affects levels and constitution of  
421 the bile acid pool, understanding the processes that regulate synthesis of secondary bile acids  
422 may have implications for organ systems throughout the body.

423  
424 Our study complements recent single-cell RNAseq studies of the ENS neuronal transcriptome<sup>83</sup>  
425 by giving us the ability to selectively activate specific enteric neurons and explore the dynamic  
426 interplay between cells of various lineages in the gut. Importantly, the transcriptomic changes  
427 we observed may be a consequence of direct or indirect effects of neuronal activation. Indeed,  
428 induced activation of ChAT<sup>+</sup> or TH<sup>+</sup> neurons rapidly changed GI transit and fluid secretion  
429 patterns, which are only a fraction of the processes that may feed back on epithelial or immune  
430 cells, altering their gene expression profiles. Further single-cell analysis may help dissect the  
431 roles of the various intestinal cells that collaborate to coordinate gut functions.

432  
433 The ENS adapts and responds to incredibly diverse molecular cues from the environment and  
434 must do so throughout the entire length and surface area of the intestines—the largest and most  
435 extensive internal organ, with a rich network of neurons termed the “second brain” (Gershon,  
436 2015). Exposure to molecules from the diet or the microbiome may modulate ENS function,  
437 along with signals from outside the gut such as the circulatory system. Curiously, many  
438 disorders of the brain are also associated with GI symptoms<sup>84–88</sup>. While mechanisms linking the  
439 gut and the brain, and their consequences for health, are an active area of study, the impact of  
440 neuronal activation within the ENS has largely been unexplored. Herein, we establish an  
441 experimental system that allows controlled activation of intrinsic and extrinsic neurons of the  
442 gut, separated from inputs from the brain, and demonstrate broad changes in the gut  
443 environment and its physiology that differ by activated neuronal population. The extensive  
444 datasets on activation of two major gut-associated neuronal populations that we generated  
445 should serve as a resource for further studies on the interconnected biological systems  
446 governing the complex relationship between gut physiology and the microbiome. Future  
447 deployment of this approach could enable mapping of neuronal connections into and out of the  
448 gut, providing insights into how the ENS networks with tissues throughout the body and  
449 advancing growing research into the many functions of the GI tract, an endeavor with important  
450 consequences for human health.

451

452 **Limitations of the Study**

453 It was recently shown that a similar strategy using AAV-PHP.S-hSYN1 in ChAT-Cre mice also  
454 labels ChAT<sup>+</sup> neurons in cardiac ganglia, and activation of cholinergic neurons reduces heart  
455 rate and blood pressure<sup>89,90</sup>. Cardiac afferent neurons signal through the vagus nerve and  
456 jugular-nodose ganglia to the brain, and in sensory pathways through the DRGs and spinal  
457 cord<sup>91</sup>. Though there is no known direct route for signaling from cardiac ganglia to gut-  
458 associated neurons, it is possible that the gut may be impacted by an indirect route involving the  
459 CNS. In the future, further refinement of AAVs through directed evolution may generate  
460 serotypes with exclusive tropism for the ENS and allow full separation of the functions of  
461 intrinsic and extrinsic activation of gut-associated neuronal subsets. Since the hSYN1 promoter  
462 we used has been shown to drive expression only in neurons<sup>92,93</sup>, we did not characterize other  
463 cell types, such as enteroendocrine cells (EECs), also called neuropod cells, which were  
464 recently shown to form synapses with enteric neurons and contribute to sensory transmission  
465 from the gut to the brain through the vagus nerve. Since these cells turn over every few days<sup>94</sup>  
466 and have not been reported to express TH or ChAT, we think it unlikely that they are a major  
467 contributor to the activation-induced phenotypes we observed, but we cannot completely rule  
468 out their involvement.

469

470

471

472 **ACKNOWLEDGMENTS**

473 We thank members of the Mazmanian laboratory and Dr. Jonathan Hoang for discussions  
474 throughout the research project and critical reading of the manuscript, and Dr. Catherine  
475 Oikonomou for invaluable manuscript editing. We thank Dr. Andres Collazo and Caltech's  
476 Biological Imaging Facility for training and access to microscopy capabilities and the Caltech  
477 Proteome Exploration Laboratory for access to LC-MS/MS capabilities. We thank Professor  
478 Elisa Hill-Yardin for providing MATLAB scripts for CMMC heatmaps. This research was funded  
479 in part by Aligning Science Across Parkinson's (ASAP-020495 and ASAP-000375) through the  
480 Michael J. Fox Foundation for Parkinson's Research (MJFF). For the purpose of open access,  
481 the authors have applied a CC BY 4.0 public copyright license to all Author Accepted  
482 Manuscripts arising from this submission. S.K.M. was supported by grants from the Heritage  
483 Medical Research Institute, Emerald Foundation, Caltech Center for Environmental and  
484 Microbial Interactions (CEMI), the National Institutes of Health (GM007616 and DK078938), and  
485 the Department of Defense (PD160030). P.C.D. was supported by grants from National Institute  
486 of Diabetes and Digestive and Kidney Diseases (R01DK136117 and U24DK133658).

487

488

489

490 **AUTHOR CONTRIBUTIONS**

491 J.A.G., B.B.Y., and S.K.M. designed experiments. J.A.G. and B.B.Y. performed experiments.  
492 K.Y.C., C.C. (supervised by V.G.), and J.A.G. helped with AAV-mediated ENS characterization.  
493 P.T.B (supervised by D.W.W.), M.J.S., and A.M. performed acquisition and analysis of  
494 proteomic data. V.C., G.H., G.S., Q.Z., and J.S. (supervised by R.K.) performed acquisition and  
495 analysis of metagenomic data. K.W. (supervised by P.C.D.) performed acquisition and analysis  
496 of metabolomic data. T.M.T. assisted in animal-related work. J.A.G., B.B.Y., and S.K.M wrote  
497 the manuscript with input from all authors.

498

499

500 **DECLARATION OF INTERESTS**

501 B.B.Y. declares financial interests in Nuanced Health, which is not related to the present study.  
502 S.K.M. declares financial interests in Axial Therapeutics and Nuanced Health, which is not  
503 related to the present study. P.C.D. is an advisor and holds equity in Cybele and Sirenas and a  
504 Scientific co-founder, advisor and holds equity to Ometa, Enveda, and Arome with prior  
505 approval by UC-San Diego. He also consulted for DSM animal health in 2023. R.K. is a  
506 scientific advisory board member, and consultant for BiomeSense, Inc., has equity and receives  
507 income. He is a scientific advisory board member and has equity in GenCirq. He is a consultant  
508 and scientific advisory board member for DayTwo, and receives income. He has equity in and  
509 acts as a consultant for Cybele. He is a co-founder of Biota, Inc., and has equity. He is a  
510 cofounder of Micronoma, and has equity and is a scientific advisory board member. The terms  
511 of these arrangements have been reviewed and approved by the University of California, San  
512 Diego in accordance with its conflict of interest policies.

513

## 514 Main Figure Titles & Legends

515

### 516 **Figure 1. ChAT<sup>+</sup> versus TH<sup>+</sup> Neuronal Distribution in the ENS**

517 (A) Representative images of SI and colon from mice infected with AAV-PHP.S-hSYN1-tdTomato and  
518 immunolabelled with the pan-neuronal antibody PGP9.5. Inset shows quantification of the ratio of  
519 tdTomato<sup>+</sup> cells / PGP9.5<sup>+</sup> cells (N=3 mice, each data point represents the average of 3 representative  
520 fields).

521 (B) Representative images of proximal and distal regions of the SI and colon from AAV-PHP.S-hSYN1-  
522 XFP infected mice. Dotted lines demarcate the rugae (folds) in the proximal colon.

523 (C) Representative images of cross-sections, myenteric, and submucosal plexuses in ChAT-Cre and TH-  
524 Cre mice infected with AAV-PHP.S-hSYN1-DIO-XFP.

525 (D-E) Density of neurons in the myenteric plexus and submucosal plexus of ChAT-Cre and TH-Cre mice  
526 normalized to the number of crypts (N=3 mice, each data point represents the average of 3 representative  
527 fields ChAT-Cre vs. TH-Cre mice were compared using two-way ANOVAs with Sidak's correction for  
528 multiple comparisons for the SI and LI independently; Comparison of different regions in the SI of ChAT-  
529 Cre or TH-Cre mice were analyzed using one-way ANOVAs with Tukey's correction for multiple  
530 comparisons).

531 [See also Figures S1-S5 and Video Supplement 1](#)

532

### 533 **Source Data Figure 1**

534 [https://github.com/mazmanianlab/Griffiths\\_Yoo\\_et\\_al/tree/main/ENS%20quantification](https://github.com/mazmanianlab/Griffiths_Yoo_et_al/tree/main/ENS%20quantification)

535

### 536 **Figure 2. Gut-Associated ChAT<sup>+</sup> and TH<sup>+</sup> Neuronal Activation Alters the Gut Microbiome**

537 (A) Experimental paradigm: Cre-dependent hM3Dq was virally administered to either ChAT-Cre or TH-  
538 Cre mice. After 3-4 weeks of expression, C21 was injected daily for 10 days to induce specific neuronal  
539 activation. Feces were sampled the day prior to the first C21 injection and on days 2, 6, and 10 of C21  
540 administration, and tissue and cecal contents were collected one hour after the last injection.

541 (B) Faith's phylogenetic diversity of feces and cecal contents over 10 days of neuronal activation in  
542 ChAT<sup>+</sup> and TH<sup>+</sup> mice. Feces were collected pre-experiment (1 day before first injection) and on day 2, 6,  
543 and 10. Cecal contents were collected at experimental endpoint on day 10.

544 (\*\*p<0.01, \*\*\*p<0.001 determined by Kruskal-Wallis one-way ANOVA)

545 (C-H) Weighted UniFrac principle coordinate analysis (PCoA) of Activated vs. Control in ChAT<sup>+</sup> and TH<sup>+</sup>  
546 mice. Statistics performed in QIIME2 as in Bolyen et al., 2019<sup>95</sup>

547 (I) Stacked bar graph showing phylum-level changes in relative abundance on day 6 and day 10 of  
548 injection for feces and day 10 for cecal contents

549 (J-M) Linear discriminant analysis (LDA) Effect Size (LEfSe) of the cecal microbiome. Cladograms  
550 showing differential phylogenetic clusters and family-level differences in activated and control (J,K) ChAT<sup>+</sup>  
551 and (L,M) TH<sup>+</sup> mice

552 (Cutoff:  $\log_{10}(\text{LDA Score}) > 2$  or  $< -2$ )

553 (N-O) Changes in relative abundance of *Akkermansia muciniphila* in feces and cecal contents of (N)  
554 ChAT<sup>+</sup> and (O) TH<sup>+</sup> mice. (n=11-14 mice per group, per time point; red=Control, green=hM3Dq-Activated,  
555 \*p<0.05, \*\*p<0.01, determined by multiple t-tests with Holm-Sidak correction for multiple comparisons)

556 (P-S) Beta-diversity of bacterial gene families and pathways in the (P,R) cecum and (Q,S) post-9 feces of  
557 control and activated mice. The direction and length of arrows indicate their influence in separating  
558 control and activated groups. Colors represent gene families and pathways (annotated in Figure S7).

559 [See also Figures S6 and S7](#)

560

### 561 **Source Data Figure 2**

562 [https://github.com/mazmanianlab/Griffiths\\_Yoo\\_et\\_al/tree/main/metagenomics](https://github.com/mazmanianlab/Griffiths_Yoo_et_al/tree/main/metagenomics)

563

564

### 565 **Figure 3. Gut-Associated ChAT<sup>+</sup> or TH<sup>+</sup> Neuronal Activation Alters Host and Microbe-**

566 **Derived Luminal Metabolites**

567 (A-B) Canberra PCoA of the cell-free, luminal metabolome of cecal contents from control (red) and  
568 activated (green) ChAT<sup>+</sup> and TH<sup>+</sup> mice. Statistical analyses were performed in QIIME2 as in Bolyen et al.,  
569 2019<sup>95</sup>  
570 (C-D) Metabolic networks constructed from identified cecal metabolites in TH<sup>+</sup> and ChAT<sup>+</sup> mice. Each  
571 node is colored by its upregulation (green) or downregulation (red) in the activated group and is labelled  
572 with an ID number corresponding to annotation, mass-to-charge ratio, retention time, fold change, and  
573 significance value in Table S1  
574 (E) Fold changes of specific bile acids identified as upregulated (green bars) or downregulated (red bars)  
575 in activated ChAT<sup>+</sup> mice  
576 (F) Annotations of bile acids highlighted in (E). Metabolite IDs are colored according to annotation as  
577 primary (blue) or secondary (orange) bile acids. Metabolite IDs are specific to each sample (N=12-14 for  
578 each group analyzed, \*: p<0.05, \*\*: p<0.01, \*\*\*: p<0.001, \*\*\*\*: p<0.0001)  
579 [See also Table S1](#)  
580

#### 581 **Figure 4. Gut-Associated ChAT<sup>+</sup> or TH<sup>+</sup> Neuronal Activation Alters Host and Microbe-** 582 **Derived Luminal Proteins**

583 (A) Volcano plot of differentially-expressed host proteins identified in the cecal contents of ChAT<sup>+</sup>-  
584 activated (N=8) vs. ChAT<sup>+</sup>-control mice (N=9) mice, 1 hour after final C21 administration  
585 (B) STRING network analysis of host proteins that were more abundant in ChAT<sup>+</sup>-activated mice ( $p_{nom.} <$   
586 0.2)  
587 (C) Proteomic volcano plot of TH<sup>+</sup>-activated vs. TH<sup>+</sup>-control mice (N=7 mice per group)  
588 (D) STRING network analysis of upregulated host proteins in TH<sup>+</sup>-activated mice ( $p_{nom.} <$  0.2).  
589 (E-F) Unipept metaproteomic analysis of upregulated microbial proteins (fold change > 2,  $p_{nom.} <$  0.2) in  
590 TH<sup>+</sup>-activated and ChAT<sup>+</sup>-activated mice (N=7-9 mice per group)  
591

#### 592 **Source Data Figure 4A**

593 [https://github.com/mazmanianlab/Griffiths\\_Yoo\\_et\\_al/blob/main/proteomics/CHAT\\_proteomics\\_volcano.tx](https://github.com/mazmanianlab/Griffiths_Yoo_et_al/blob/main/proteomics/CHAT_proteomics_volcano.txt)  
594 [t](#)

#### 595 **Source Data Figure 4C**

596 [https://github.com/mazmanianlab/Griffiths\\_Yoo\\_et\\_al/blob/main/proteomics/TH\\_proteomics\\_volcano.txt](https://github.com/mazmanianlab/Griffiths_Yoo_et_al/blob/main/proteomics/TH_proteomics_volcano.txt)

#### 597 **Source Data Figures 4E and 4F**

598 [https://github.com/mazmanianlab/Griffiths\\_Yoo\\_et\\_al/blob/main/proteomics/metaproteomics/Microbiome](https://github.com/mazmanianlab/Griffiths_Yoo_et_al/blob/main/proteomics/metaproteomics/Microbiome_associated_proteins.xlsx)  
599 [associated\\_proteins.xlsx](#)

600

#### 601 **Figure 5. ChAT<sup>+</sup> and TH<sup>+</sup> Activation-Mediated Transcriptomic Changes**

602 (A-D) Differentially-expressed genes in DREADD-activated vs. control (A) ChAT<sup>+</sup> distal SI, (B) ChAT<sup>+</sup>  
603 proximal colon, (C) TH<sup>+</sup> distal SI, (D) TH<sup>+</sup> proximal colon  
604 (Dashed vertical lines: Fold Change (FC) = +/- 1.5; dashed horizontal lines:  $p_{adj.} <$  0.05. Transcripts of  
605 IEGs are highlighted in green and annotated. N=10 mice per group)  
606 (E) Fold changes of upregulated IEGs ( $p_{adj.} <$  0.05) as defined by <sup>59</sup>  
607 (F-I) Gene set enrichment analysis of gene ontology (GO) terms for (F) ChAT<sup>+</sup> distal SI, (G) ChAT<sup>+</sup>  
608 proximal colon, (H) TH<sup>+</sup> distal SI, (I) TH<sup>+</sup> proximal colon.  
609 [See also Table S2 and Table S3](#)  
610

#### 611 **Source Data Figure 5**

612 [https://github.com/mazmanianlab/Griffiths\\_Yoo\\_et\\_al/tree/main/RNAseq](https://github.com/mazmanianlab/Griffiths_Yoo_et_al/tree/main/RNAseq)

613

#### 614 **Figure 6. GI Physiology Differences in ChAT<sup>+</sup> vs. TH<sup>+</sup> mice Following Activation**

615 (A) Activation-mediated changes in whole gut transit time in ChAT<sup>+</sup> and TH<sup>+</sup> mice  
616 (B) Activation-mediated changes in fecal pellet output in ChAT<sup>+</sup> and TH<sup>+</sup> mice  
617 (C) Activation-mediated changes in normalized cecal content mass in ChAT<sup>+</sup> and TH<sup>+</sup> mice



618 (D-E) Fecal pellet water content in (D) ChAT<sup>+</sup> and (E) TH<sup>+</sup> mice over 2 hours following C21 activation with  
619 a least squares nonlinear regression displaying 95% confidence interval  
620 (F) Average fecal pellet water content in ChAT<sup>+</sup> and TH<sup>+</sup> mice following activation  
621 (A-F: N = 10-11 mice per group; \*: p<0.05, \*\*: p<0.001, \*\*\*\*: p<0.0001, determined by 2-way ANOVA  
622 with Sidak's method for multiple comparisons)  
623 (G-H) Frequency of *ex vivo* CMMCs from (G) ChAT<sup>+</sup> and (H) TH<sup>+</sup> mice over 30 minutes following  
624 activation  
625 (N = 3-6 mice per group; \*\*: p<0.01, \*\*\*: p<0.001, determined by 2-way ANOVA with Sidak's method for  
626 multiple comparisons)  
627 (I-J) Heatmaps showing frequency of CMMCs over 400 seconds following activation in *ex vivo* preps from  
628 (I) ChAT<sup>+</sup> control and (J) ChAT<sup>+</sup> DREADD-administered mice  
629 [See also Figure S6 and Table S4](#)

## 630 **METHODS**

631

### 632 **Resource availability**

633 Lead contact Further information and requests for resources and reagents should be directed to  
634 and will be fulfilled by the lead contact, Sarkis K. Mazmanian ([sarkis@caltech.edu](mailto:sarkis@caltech.edu)).

635

### 636 **Materials availability**

637 No new reagents were generated in this study.

638

### 639 **Data & Code Availability**

640 Microbial sequencing data have been deposited at the European Bioinformatics Institute  
641 (ERP131523), Metabolomic data at UCSD MassIVE repository (MSV000084550), proteomic  
642 data at UCSD MassIVE repository (MSV000087917), and QuantSeq data at NCBI GEO  
643 repository (GSE180961) and are publicly available as of the date of publication. All other  
644 experimental data used to generate the figures reported in this paper can be found at  
645 ([https://github.com/mazmanianlab/Griffiths\\_Yoo\\_et\\_al/](https://github.com/mazmanianlab/Griffiths_Yoo_et_al/)) and are publicly available as of the date  
646 of publication.

647

648 This paper does not report original code.

649

650 Any additional information required to reanalyze the data reported in this paper is available from  
651 the lead contact upon request.

## 652 **Experimental model and study participant details**

### 653 **Mice**

654 All mouse experiments were performed in accordance with the NIH Guide for the Care and Use  
655 of Laboratory Animals using protocols approved by the Institutional Animal Care and Use  
656 Committee at the California Institute of Technology. Mice were fed ad libitum for the entire  
657 duration of experiments. Homozygous TH-Cre (gift to V.G. from Ted Ebendal, B6.129X1-  
658 Thtm1(cre)Te/Kieg<sup>96</sup>) and ChAT-Cre (Jackson Laboratories, Bar Harbor, ME- Stock# 028861,  
659 RRID:IMSR\_JAX:028861) mice were bred to wild-type mice to yield the male and female  
660 heterozygous Cre-mice used for our studies. Wild-type specific pathogen free (SPF) C57BL/6  
661 (Jackson Laboratories, Bar Harbor, ME- Stock #000664, RRID:IMSR\_JAX:000664) males and  
662 females were used for breeding and experiments. Mice at 6-8 weeks of age were used for  
663 experiments.

664

### 665 **Virus Production**

666 Virus was produced using the methods described in Challis et al., 2019<sup>42</sup> and  
667 [dx.doi.org/10.17504/protocols.io.bzn6p5he](https://doi.org/10.17504/protocols.io.bzn6p5he). Briefly, human embryonic kidney (HEK293T) cells  
668 were triple-transfected with pUCmini-iCAP-AAV-PHP.S, pHelper plasmid, and one of the  
669 following pAAV genomes: hSYN1-tdTomato, hSYN1-mRuby2, hSYN1-DIO-mRuby2, hSYN1-  
670 mNeonGreen, CAG-mNeonGreen, hSYN1-DIO-mNeonGreen, hSYN1-mTurquoise2, hSYN1-  
671 DIO-mTurquoise2, hSYN1-DIO-hM3Dq-mRuby2, CAG-GCaMP6f. Cells were grown in DMEM  
672 + Glutamax + Pyruvate (Gibco, Gaithersburg, MD- Stock# 10569-010) + 5% FBS + non-  
673 essential amino acids (Gibco, Gaithersburg, MD- Stock# 11140-050) + penicillin-streptomycin  
674 (Gibco, Gaithersburg, MD- Stock# 15070-063). Virus was precipitated from cells and  
675 supernatant with an 8% PEG solution (wt/vol), and purified by ultracentrifugation using 15%,  
676 25%, 40%, 60% stacked iodixanol gradients.

677

### 678 **Method Details**



679

## 680 **Systemic Delivery of AAV**

681 Mice were anesthetized using 2% isoflurane. Virus was titered to  $1 \times 10^{12}$  vg, resuspended in a  
682 volume of 100  $\mu$ l with sterile PBS, and injected retro-orbitally as described in  
683 [dx.doi.org/10.17504/protocols.io.bzn6p5he](https://doi.org/10.17504/protocols.io.bzn6p5he).

684

## 685 **Neuronal activation of the GI tract**

686 See [dx.doi.org/10.17504/protocols.io.bzp5p5q6](https://doi.org/10.17504/protocols.io.bzp5p5q6). TH-Cre and ChAT-Cre mice were used for  
687 these experiments. "Activated" mice were infected with AAV-PHP.S-hSYN1-DIO-hM3Dq-  
688 mRuby2 and "Control Mice" were infected with AAV-PHP.S-hSYN1-DIO-mRuby2. This was to  
689 control for both AAV-PHP.S-mediated expression and the effects of Compound 21  
690 dihydrochloride (C21) (HelloBio, Princeton, NJ- HB6124). C21 was injected intraperitoneally  
691 (i.p.) at a dose of 3 mg/kg for 10 consecutive days to both groups of mice. Mice for timecourse  
692 experiments were single-housed in sterile cages with autoclaved water following the first C21  
693 administration. Injections of C21 were administered at the same time every day (10AM). Mice  
694 were sacrificed one hour after the day 10 injection.

695

## 696 **Tissue Preparation, Immunohistochemistry, Imaging, and Quantification**

697 Procedures are described in [dx.doi.org/10.17504/protocols.io.bzp6p5re](https://doi.org/10.17504/protocols.io.bzp6p5re). 100 mg/kg of  
698 pentobarbital (Euthasol - Virbac, Carros, France) was administered i.p., and tissues were  
699 perfused with 30 mL of phosphate-buffered saline (PBS) and then cold 4% paraformaldehyde  
700 (PFA) in PBS. GI tract was post-fixed in 4% PFA overnight at 4 °C, and stored in PBS + 0.025%  
701 sodium azide. Tissues that underwent subsequent immunohistochemistry were made  
702 transparent by the passive CLARITY technique (PACT) as in Treweek et al., 2015<sup>35</sup>. Briefly,  
703 perfused and fixed tissues were embedded with polymerized 4% (wt/vol) acrylamide, and lipids  
704 were eliminated using 8% (wt/vol) SDS solution. Jugular-nodose ganglia and dorsal root ganglia  
705 tissues were cryoprotected in 10% then 30% sucrose in PBS for 1 day each. Tissues were  
706 embedded and flash frozen in OCT and cryostat sectioned into 40  $\mu$ m sections. Spinal cord and  
707 brain tissues were vibratome sectioned into 50  $\mu$ m sections. Tissues were blocked in 3%  
708 donkey serum and permeabilized with PBS + 0.3% Triton (PBST). Primary antibodies were  
709 incubated in PBST for 48 hours and washed with PBST for 24 hours (replacing the wash  
710 solution 3 times). Tissues were next incubated in secondary antibodies (and DAPI) for 24 hours  
711 and washed in PBS for 48 hours, intermittently replacing the wash solution with fresh PBS.  
712 Primary antibodies used were rabbit anti-PGP9.5 (1:300; Millipore Cat# AB1761-I,  
713 RRID:AB\_2868444), rabbit anti-tyrosine hydroxylase (1:500, Abcam Cat# ab112,  
714 RRID:AB\_297840), rabbit anti-choline acetyltransferase, (1:250, Abcam Cat# ab178850,  
715 RRID:AB\_2721842), and mouse anti-NeuN (1:300, Abcam Cat# ab104224,  
716 RRID:AB\_10711040). Secondary antibodies used were donkey anti-rabbit Alexa 568 (Thermo  
717 Fisher Scientific Cat# A10042, RRID:AB\_2534017), goat anti-rabbit Alexa 647 (Thermo Fisher  
718 Scientific Cat# A-21245 (also A21245), RRID:AB\_2535813), and goat anti-mouse Alexa 594  
719 (Thermo Fisher Scientific Cat# A-11032, RRID:AB\_2534091). GI tissues imaged for virally-  
720 expressed, endogenous fluorescence were made transparent using a sorbitol-based optical  
721 clearing method, ScaleS as in Hama et al., 2015<sup>34</sup>. Tissues were mounted in method-respective  
722 mounting media (RIMS and Scales S4) on a glass slide with a 0.5mm spacer (iSpacer, SunJin  
723 Lab Co.). Images were acquired on Zeiss LSM 780 or 880, and microscope, laser settings,  
724 contrast, and gamma remained constant across images that were directly compared. All  
725 confocal images were taken with the following objectives: Fluor 5x 0.25 M27 Plan-Apochromat,  
726 10x 0.45 M27 (working distance 2.0 mm) and Plan-Apochromat 25x 0.8 Imm Corr DIC M27  
727 multi-immersion. Neurons in each ganglion were counted by counting cells that were of a  
728 distinct color. Colonic ganglia were defined as distinct if separated by a width of 3 or more  
729 neurons.

730

### 731 **GCaMP6f Fluorescence in Ex Vivo Intestinal Preparations**

732 As described in [dx.doi.org/10.17504/protocols.io.bzqap5se](https://doi.org/10.17504/protocols.io.bzqap5se), small intestinal tissue was quickly  
733 harvested from ChAT-Cre mice, flushed, and placed in oxygenated (95% O<sub>2</sub>, 5% CO<sub>2</sub>), ice cold  
734 Krebs-Henseleit solution for 1 hour followed by 15 min at room temperature. A segment was cut  
735 along the mesenteric attachment and pinned flat (mucosa facing down) on a Sylgard-lined  
736 recording chamber (Warner Instruments, PH1) in oxygenated Krebs-Henseleit solution. C21  
737 was added at 10nM and GCaMP6f fluorescence was detected on an upright microscope (Zeiss,  
738 Oberkochen, Germany- Examiner D1).

739

### 740 **Metagenomics**

741 Procedures are described in [dx.doi.org/10.17504/protocols.io.bzqep5te](https://doi.org/10.17504/protocols.io.bzqep5te).

### 742 **Fecal collection**

743 AAV-PHP.S-hSYN1-DIO-hM3Dq-mRuby2 (10<sup>12</sup> vg) was delivered systemically to TH-Cre and  
744 ChAT-Cre mice. 3-4 week after infection, C21 (3 mg/kg) was administered daily for 10  
745 consecutive days. Fecal pellets were collected in sterile containers one day before the initial  
746 C21 dose, and on day 2, 6, and 10 of injections.

### 747 **Fecal sample DNA extraction and library preparation**

748 DNA was extracted with the Qiagen MagAttract PowerSoil DNA kit as previously described in  
749 Marotz et al., 2017<sup>118</sup>. This protocol is optimized for an input quantity of 1 µg DNA per reaction.  
750 Prior to library preparation, input DNA was transferred to a 384-well plate and quantified using a  
751 PicoGreen fluorescence assay (ThermoFisher, Inc). Input DNA was then normalized to 1 µg in  
752 a volume of 3.5 µL of molecular-grade water using an Echo 550 acoustic liquid-handling robot  
753 (Labcyte, Inc). Enzyme mixes for fragmentation, end repair and A-tailing, ligation, and PCR  
754 were prepared and added in approximately 1:8 scale volumes using a Mosquito HV  
755 micropipetting robot (TTP Labtech). Fragmentation was performed at 37 °C for 20 min,  
756 followed by end repair and A-tailing at 65 °C for 30 min.

757

758 Sequencing adapters and barcode indices were added in two steps, following the iTru adapter  
759 protocol<sup>119</sup>. Universal “stub” adapter molecules and ligase mix were first added to the end-  
760 repaired DNA using the Mosquito HV robot and ligation performed at 20 °C for 1 h. Unligated  
761 adapters and adapter dimers were then removed using AMPure XP magnetic beads and a  
762 BlueCat purification robot (BlueCat Bio). 7.5 µL magnetic bead solution was added to the total  
763 adapter-ligated sample volume, washed twice with 70% EtOH, and then resuspended in 7 µL  
764 molecular-grade water.

765

766 Next, individual i7 and i5 were added to the adapter-ligated samples using the Echo 550 robot.  
767 Because this liquid handler individually addresses wells, and we used the full set of 384 unique  
768 error-correcting i7 and i5 indices, we were able to generate each plate of 384 libraries without  
769 repeating any barcodes, eliminating the problem of sequence misassignment due to barcode  
770 swapping<sup>120,121</sup>. To ensure that libraries generated on different plates could be pooled if  
771 necessary, and to safeguard against the possibility of contamination due to sample carryover  
772 between runs, we also iterated the assignment of i7 to i5 indices each run, such that each  
773 unique i7:i5 index combination was repeated only once every 147,456 libraries. 4.5 µL of  
774 eluted bead-washed ligated samples was added to 5.5 µL of PCR master mix and PCR-  
775 amplified for 15 cycles. The amplified and indexed libraries were then purified again using  
776 magnetic beads and the BlueCat robot, resuspended in 10 µL water, and 9 µL of final purified  
777 library transferred to a 384-well plate using the Mosquito HV liquid-handling robot for library  
778 quantitation, sequencing, and storage. 384 samples were then normalized based on a  
779 PicoGreen fluorescence assay.

### 780 **Shallow shotgun metagenome sequencing and diversity analysis**

781 The Illumina data for each HiSeq lane was uploaded to Qiita, a tool with standardized pipelines  
782 for processing and analyzing metagenomic data<sup>122</sup>. Adapter sequences were removed from the  
783 reads using the Atropos v.1.1.15 (RRID:SCR\_023962, <https://github.com/jdidion/atropos>)<sup>123</sup>  
784 command (from the qp-shogun 0.1.5 pipeline) and the trimmed sequences were downloaded  
785 from Qiita. The reads for each sample were filtered of any potential mouse contamination using  
786 Bowtie2 v.2-2.2.3<sup>98</sup> (RRID:SCR\_016368, [https://bowtie-](https://bowtie-bio.sourceforge.net/bowtie2/index.shtml)  
787 [bio.sourceforge.net/bowtie2/index.shtml](https://bowtie-bio.sourceforge.net/bowtie2/index.shtml)). The filtered reads were then aligned to the Web of  
788 Life (WoL) reference phylogeny<sup>124</sup> with Bowtie2 using an adapted SHOGUN pipeline<sup>125</sup>. The  
789 WoL contains 10,575 bacterial and archaeal genomes, with each genome representing an  
790 operational taxonomic unit (OTU). Sequencing reads that did not map to a single reference  
791 genome as well as reads that mapped to multiple genomes were not included in the analysis. If  
792 an OTU had a relative abundance less than 0.01% in a given sample, the OTU was not included  
793 for that sample. Additionally, OTUs with fewer than 5 assigned reads were not considered. The  
794 samples were rarefied to a depth of 12,750 reads and those with fewer than the rarefaction  
795 depth were excluded. The QIIME2 v.2019.7<sup>95</sup> (RRID:SCR\_021258, <https://qiime2.org/>)  
796 DEICODE plugin was used to calculate the Aitchison distances, a compositional beta diversity  
797 metric, and perform Robust Aitchison PCA to create biplots that visualize relationships between  
798 features and samples<sup>126</sup>. The QIIME2 diversity plugin was used to calculate the other alpha- and  
799 beta-diversity metrics used in this study.

#### 800 **Metagenomics-based functional profiling**

801 The filtered reads were also analyzed using HUMAnN2 v2.8.1<sup>99</sup> (RRID:SCR\_016280,  
802 <https://huttenhower.sph.harvard.edu/humann2>) to establish functional profiles for the samples.  
803 HUMAnN2 is a pipeline that begins by using MetaPhlan2 to compile custom databases of  
804 reference genomes based on the species detected in a sample<sup>127</sup>. HUMAnN2 then maps the  
805 filtered reads onto these custom databases and the reads that do not map to any of the  
806 references are then subjected to a translated search against UniProt Reference Clusters or  
807 UniRef<sup>100</sup> (RRID:SCR\_010646, <https://www.uniprot.org/help/uniref>). Here, the UniRef90  
808 database was used for the translated search and installed according to the HUMAnN2  
809 documentation. The results from both the search performed using the custom reference  
810 genome database and the search against the UniRef90 database were combined and the gene  
811 families identified in each sample were reported in units of reads per kilobase (RPKs) to account  
812 for gene length. HUMAnN2 also compared the gene families found in a sample with the  
813 MetaCyc pathways database<sup>128</sup> (RRID:SCR\_007778, <https://metacyc.org/>) and output a table  
814 reporting the pathway abundances found in each sample. After rarefying gene family tables to a  
815 depth of 166,000 RPKs and using a depth of 22,600 for pathway abundances, the QIIME2  
816 diversity and DEICODE plugins were used to calculate alpha- and beta-diversity metrics. The  
817 metagenomics data from this study are available from  
818 ([https://github.com/mazmanianlab/Griffiths\\_Yoo\\_et\\_al/tree/main/metagenomics](https://github.com/mazmanianlab/Griffiths_Yoo_et_al/tree/main/metagenomics)).

#### 819 **Metabolomics**

820 Procedures are described in [dx.doi.org/10.17504/protocols.io.bzqfp5tn](https://doi.org/10.17504/protocols.io.bzqfp5tn).

#### 821 **Sample preparation**

822 Frozen cecal samples were transported on dry ice for metabolomics analysis. The samples  
823 were weighed and an extraction solvent (1:1 methanol to water with an internal standard of 1  
824  $\mu$ M sulfamethazine) was added at a 1:10 milligram to microliter ratio. The samples were then  
825 homogenized using a TissueLyser II (Qiagen) for 5 minutes at 25 Hz followed by a 15 min  
826 centrifugation at 14,000 rpm. 120  $\mu$ L of supernatant was transferred to a 96-well DeepWell plate  
827 (Eppendorf) and lyophilized using a CentriVap Benchtop Vacuum Concentrator (Labconco) and  
828 stored at -80 °C. At the time of data acquisition, the lyophilized plates were resuspended in a  
829 1:1 methanol to water solvent spiked with 1  $\mu$ M of sulfadimethoxine. The plates were vortexed

830 for 2 minutes, centrifuged at 14,000 rpm for 15 min and 120  $\mu$ L of the supernatant was  
831 transferred to a 96-well autosampler plate (Eppendorf). Plates were stored at 4 °C prior to  
832 LCMS analysis.

### 833 **Data acquisition**

834 The untargeted metabolomics analysis was completed using an ultra-high performance liquid  
835 chromatography system (Thermo Dionex Ultimate 3000 UHPLC) coupled to an ultra-high  
836 resolution quadrupole time of flight (qTOF) mass spectrometer (Bruker Daltonics MaXis HD). A  
837 Phenomenex Kinetex column (C18 1.7  $\mu$ m, 2.1 mm x 50 mm) was used for chromatographic  
838 separation. An injection volume of 5  $\mu$ L was used for each sample and a flow-rate of 0.500 mL  
839 was used throughout the analysis. The mobile phase consisted of solvent A: 100% LC-MS  
840 grade water spiked with 0.1% formic acid and solvent B: 100% LC-MS grade acetonitrile spiked  
841 with 0.1% formic acid. The chromatographic gradient was as follows: 0.0–1.0 min, 5% B; 1.0–  
842 9.0 min, 5–100% B; 9.0–11.0 min, 100% B; 11.0–11.5 min, 100–5% B; 11.5–12.5 min, 5% B.  
843 Data was collected with electrospray ionization in positive mode, and was saved as .d file  
844 folders.

### 845 **Data processing**

846 The raw .d data files were converted to mzXML format using Bruker Compass DataAnalysis 4.1  
847 software. The resulting .mzXML file, the original .d file folders, and basic prep information sheet  
848 are stored in the UC San Diego MassIVE data repository under the accession number  
849 MSV000084550. For MS1 level feature detection, the open-source software MZmine version  
850 2.51 (RRID:SCR\_012040, <https://mzmine.github.io/>) was used. The parameters used are as  
851 follows: 1) Mass Detection (Centroid, Noise Level MS1 1E3, MS2 1E2); 2) ADAP  
852 Chromatogram Builder (Min Group size in # of scans=3, Group Intensity Threshold= 3E3, Min  
853 Highest Intensity=1E3, m/z tolerance 0.01 m/z or 10.0 ppm); 3) Chromatogram Deconvolution  
854 (Local Minimum Search>Chromatographic Threshold 0.01%, Minimum in RT range 0.50 min,  
855 <Minimum Relative Height 0.01%, Minimum Absolute Height 3E3, Min Ratio of Peak Top/Edge  
856 2, Peak Duration Range 0.05–0.50 min; m/z Calculation Auto, m/z range for MS2 pairing 0.01  
857 Da, and RT Range for MS2 Pairing 0.1 min); Isotopic Peaks Grouper (m/z Tolerance 0.01 m/z  
858 or 10.0 ppm, Retention Time Tolerance 0.3 min, Maximum Charge 4, Representative Ion Most  
859 Intense); Join Aligner (m/z Tolerance 0.01 m/z or 10.0 ppm, Weight for m/z 75, Retention Time  
860 Tolerance 0.3 min, Weight for RT 25); Gap-Filling Peak Finder (Intensity Tolerance 20%, m/z  
861 Tolerance 0.005 m/z or 10.0 ppm, Retention Time Tolerance 0.2 min). The resulting feature  
862 table was saved as a .csv file and .mgf file for use in GNPS and MetaboAnalyst.

### 863 **Molecular networking and statistical analysis**

864 Molecular networking was performed using the feature networking tool available through the  
865 Global Natural Products Social Molecular Networking (GNPS, RRID:SCR\_019012,  
866 <https://gnps.ucsd.edu/ProteoSAFe/static/gnps-splash.jsp>) portal:  
867 [https://gnps.ucsd.edu/ProteoSAFe/index.jsp?params=%7B%22workflow%22:%22FEATURE-](https://gnps.ucsd.edu/ProteoSAFe/index.jsp?params=%7B%22workflow%22:%22FEATURE-BASED-MOLECULAR-NETWORKING%22,%22library_on_server%22:%22d.speclibs;%22%7D)  
868 [BASED-MOLECULAR-](https://gnps.ucsd.edu/ProteoSAFe/index.jsp?params=%7B%22workflow%22:%22FEATURE-BASED-MOLECULAR-NETWORKING%22,%22library_on_server%22:%22d.speclibs;%22%7D)  
869 [NETWORKING%22,%22library\\_on\\_server%22:%22d.speclibs;%22%7D](https://gnps.ucsd.edu/ProteoSAFe/index.jsp?params=%7B%22workflow%22:%22FEATURE-BASED-MOLECULAR-NETWORKING%22,%22library_on_server%22:%22d.speclibs;%22%7D).

870 The annotations obtained using this workflow fall under MSI level 2 or 3 and were used for  
871 feature analysis<sup>48</sup>. Briefly, level 2 compounds are putatively annotated, meaning they are not  
872 identified using chemical reference standards but rather based on physical properties and/or  
873 spectral similarities to available spectral libraries (publicly available and purchased NIST17  
874 CID). Level 3 compounds are putatively characterized classes of compounds identified similarly  
875 to level 2 compounds. The feature-based molecular networking workflow on GNPS<sup>129</sup> was  
876 utilized in order to analyze the spectra associated with the feature tables produced using the  
877 open source software Mzmine version 2.51<sup>101</sup> (RRID:SCR\_012040, <https://mzmine.github.io/>).  
878 The .mgf and .csv outputs from MZmine v2.51 were used to run the workflow. The GNPS  
879 workflow parameters used were as follows: Precursor Ion Mass 0.02 Da, Fragment Ion Mass  
880 Tolerance 0.02 Da, Min Pairs Cos 0.7, Minimum Matched Fragments 6, Maximum Shift



881 Between Precursors 500 Da, Network TopK 10, Maximum Connected Component Size (Beta)  
882 100, and the files were row sum normalized. Default parameters were used for the rest of the  
883 settings. Visualizations and statistical analyses were performed using QIIME 2 v.2019.10<sup>95</sup>  
884 (RRID:SCR\_021258), MetaboAnalyst<sup>102</sup> (RRID:SCR\_015539, <https://www.metaboanalyst.ca/>)  
885 and Cytoscape v3.7.2<sup>103</sup> (RRID:SCR\_003032, <https://cytoscape.org/>). The metabolomics data  
886 from this study are available from  
887 ([https://github.com/mazmanianlab/Griffiths\\_Yoo\\_et\\_al/tree/main/metabolomics](https://github.com/mazmanianlab/Griffiths_Yoo_et_al/tree/main/metabolomics)).  
888

## 889 **Proteome Preparation**

890 Procedures are described in [dx.doi.org/10.17504/protocols.io.bzqcp5sw](https://doi.org/10.17504/protocols.io.bzqcp5sw).

### 891 **Protein extraction**

892 Mice were sacrificed 1 hour after the final C21 administration and cecal contents were isolated  
893 and resuspended in 400  $\mu$ l of phosphate buffered solution and centrifuged at 20,000 xg to spin  
894 down cells and lysate. Protein was isolated from the resulting supernatant using Wessel-  
895 Flügge's methanol/chloroform extraction method (Wessel and Flügge, 1984). Briefly, MeOH and  
896 chloroform were added to the samples at a 4:1 and 1:1 ratio, respectively. Next, dH<sub>2</sub>O was  
897 added at a 3:1 ratio, samples were vortexed and centrifuged at 20,000 xg. Resulting  
898 precipitated protein was collected and washed with MeOH. Precipitated protein was centrifuged  
899 and left to air dry, and stored at -20 °C until protein digestion.

### 900 **In-solution protein digestion and desalting**

901 Precipitated protein samples were denatured in 40  $\mu$ l of 8M Urea (100 mM Tris-HCl pH 8.5). To  
902 reduce disulfide bonds, 1.25  $\mu$ l of 100 mM Tris(2-carboxyethyl)Phosphine was added and  
903 incubated at room temperature (RT) for 20 minutes. Then 1.8  $\mu$ l of 250 mM iodoacetamide was  
904 added and incubated at RT in the dark to alkylate cysteines. The first step of digestion was  
905 initiated by adding 1  $\mu$ l of 0.1  $\mu$ g/ $\mu$ l of lysyl endopeptidase. After 4 hours of incubation, the urea  
906 concentration was adjusted to 2 M by adding 120  $\mu$ l of 100 mM Tris-HCl pH 8.5. The second  
907 step of digestion was done by adding 2.5  $\mu$ l of 2 $\mu$ g/ $\mu$ l trypsin plus 1.6  $\mu$ l of 100 mM CaCl<sub>2</sub> and  
908 incubating overnight in the dark. Formic acid was added to stop trypsin digestion. Digested  
909 peptides were desalted by HPLC using a C8 peptide microtrap (Microm Bioresources),  
910 lyophilized, and diluted to 200 ng/ $\mu$ l in 0.2% formic acid prior to LC-MS/MS analysis.

### 911 **LC-MS/MS**

912 Samples were analyzed on a Q Exactive HF Orbitrap mass spectrometer coupled to an EASY  
913 nLC 1200 liquid chromatographic system (Thermo Scientific, San Jose, CA). Approximately 200  
914 ng of peptides were loaded on a 50  $\mu$ m I.D.  $\times$  25 cm column with a 10  $\mu$ m electrospray tip  
915 (PicoFrit from New Objective, Woburn, MA) in-house-packed with ReproSil-Pur C18-AQ 1.9  $\mu$ m  
916 (Dr. Maisch, Ammerbuch, Germany). Solvent A consisted of 2% MeCN in 0.2% FA and solvent  
917 B consisted of 80% MeCN in 0.2% FA. A non-linear 60 minute gradient from 2% B to 40% B  
918 was used to separate the peptides for analysis. The mass spectrometer was operated in a data-  
919 dependent mode, with MS1 scans collected from 400-1650 m/z at 60,000 resolution and MS/MS  
920 scans collected from 200-2000 m/z at 30,000 resolution. Dynamic exclusion of 45 s was used.  
921 The top 12 most abundant peptides with charge states between 2 and 5 were selected for  
922 fragmentation with normalized collision energy of 28.

### 923 **Peptide and protein identification**

924 Thermo .raw files were converted to .ms1 and .ms2 files using RawConverter 1.1.0.18  
925 operating in data dependent mode and selecting for monoisotopic m/z. Tandem mass spectra  
926 (.ms2 files) were identified by a database search method using the Integrated Proteomics  
927 Pipeline 6.5.4 (IP2, Integrated Proteomics Applications, Inc.,  
928 <http://www.integratedproteomics.com>). Briefly, databases containing forward and reverse  
929 (decoy)<sup>130,131</sup> peptide sequences were generated from *in silico* trypsin digestion of either the  
930 mouse proteome (UniProt; Oct. 2, 2019)<sup>104</sup> or protein sequences derived from large  
931 comprehensive public repositories (ComPIL 2.0)<sup>105</sup>. Tandem mass spectra were matched to

932 peptide sequences using the ProLuCID/SEQUEST (1.4)<sup>106,107</sup> software package. The validity of  
933 spectrum-peptide matches was assessed using the SEQUEST-defined parameters XCorr  
934 (cross-correlation score) and DeltaCN (normalized difference in cross-correlation scores) in the  
935 DTASelect2 (2.1.4)<sup>108,109</sup> software package. Search settings were configured as follows: (1) 5  
936 ppm precursor ion mass tolerance, (2) 10 ppm fragment ion mass tolerance, (3) 1% peptide  
937 false discovery rate, (4) 2 peptide per protein minimum, (5) 600-6000 Da precursor mass  
938 window, (6) 2 differential modifications per peptide maximum (methionine oxidation:  
939 M+15.994915 Da), (7) unlimited static modifications per peptide (cysteine  
940 carbamidomethylation: C+57.02146 Da), and (8) the search space included half- and fully-  
941 tryptic (cleavage C-terminal to K and R residues) peptide candidates with unlimited (mouse  
942 database, custom metagenomic shotgun database) or 2 missed cleavage events (ComPIL 2.0).

#### 943 ***Differential analysis of detected proteins using peptide-spectrum matches (spectral*** 944 ***counts)***

945 Detected proteins were grouped by sequence similarity into "clusters" using CD-HIT 4.8.1  
946 (RRID:SCR\_007105, <http://weizhong-lab.ucsd.edu/cd-hit/>)<sup>110,111,132</sup> at the following similarity cut-  
947 offs: 65%, 75%, 85%, and 95%. The following is an example command line input: "cd-hit -i  
948 fastafasta.fasta -o outputfile -c 0.65 -g 1 -d 0". Tandem mass spectra identified as peptides  
949 (peptide spectrum matches, PSMs) were mapped to CD-HIT generated clusters. PSMs  
950 mapping to >1 cluster were discarded. Cluster-PSM tables were generated and differential  
951 analysis was performed in DESeq2 (1.25.13, RRID:SCR\_015687,  
952 <https://bioconductor.org/packages/release/bioc/html/DESeq2.html>)<sup>112</sup>. Briefly, count data  
953 (PSMs) were modeled using the negative binomial distribution, and the mean-variance  
954 relationship was estimated. Variance was estimated using an information sharing approach  
955 whereby a single feature's (or cluster's) variance was estimated by taking into account  
956 variances of other clusters measured in the same experiment. Feature significance calling and  
957 ranking were performed using estimated effect sizes. Multiple testing correction was performed  
958 by the Benjamini-Hochberg method within the DESeq2 package. Volcano plots were generated  
959 in Prism (GraphPad).

#### 960 ***Differential analysis of detected proteins using ion intensity (precursor intensity)***

961 Detected proteins were grouped into "clusters" by sequence similarity using CD-HIT  
962 4.8.1<sup>110,111,132</sup> at the following similarity cut-offs: 65%, 75%, 85%, and 95%. The following is an  
963 example command line input: "cd-hit -i fastafasta.fasta -o outputfile -c 0.65 -g 1 -d 0". Using the  
964 Census software package<sup>133</sup> (Integrated Proteomics Pipeline 6.5.4), peptide ion intensities were  
965 calculated from .ms1 files. Peptide ion intensities were assigned to their parent peptide, then  
966 parent peptides were mapped to their appropriate CD-HIT generated clusters. Ion intensities  
967 belonging to parent peptides that mapped to >1 CD-HIT cluster were discarded. Cluster-ion  
968 intensity tables were generated.

969  
970 Ion intensity data were analyzed using the Differential Enrichment analysis of Proteomics data  
971 DEP package (RRID:SCR\_023090,  
972 <https://bioconductor.org/packages/release/bioc/html/DEP.html>)<sup>113</sup> operating in R. Intensity  
973 values were automatically Log2 transformed in DEP. The cluster list was subsequently filtered  
974 with the 'filter\_proteins' function such that clusters with missing values above a 65% threshold  
975 were discarded. Remaining intensities were further transformed by the 'normalize\_vsn'  
976 function<sup>134</sup>. Missing data in remaining clusters were imputed using a mixed approach. Clusters  
977 where either the control or treatment group contained only null entries were classified as  
978 'missing not at random' (MNAR) and imputed with 0 values. All other groups were treated as  
979 'missing at random' (MAR) and imputed using the maximum likelihood method ('MLE')<sup>135</sup>. Note  
980 that for a given cluster, missing values for treatment groups were imputed separately by  
981 treatment group. Differential expression analyses were performed on filled-in cluster-ion

982 intensity tables using the 'test\_diff' function<sup>136</sup> and multiple testing correction was performed  
983 using the 'add\_rejections' function.

#### 984 **Network analysis using the STRING database**

985 Upregulated proteins with a nominal p-value < 0.2 were searched against protein-protein  
986 interactions in the STRING database<sup>114</sup> (RRID:SCR\_005223, <http://www.string-db.org>) where  
987 high confidence interactions are selected for. Briefly, the STRING database sources protein-  
988 protein interactions from primary databases consisting of genomic context predictions, high-  
989 throughput lab experiments, (conserved) co-expression, automated text mining, and previous  
990 knowledge in databases<sup>114</sup>.

#### 991 **Metaproteome analysis using Unipept**

992 Upregulated tryptic, microbial peptide sequences, with fold change and nominal p-value cutoffs  
993 of >2 and <0.2, respectively, were input into Unipept (<http://unipept.ugent.be>)<sup>137,138</sup>, equating  
994 leucine and isoleucine and filtering duplicate peptides. Briefly, Unipept indexes tryptic peptide  
995 sequences from the UniProtKB and details peptides with NCBI's taxonomic database. Lowest  
996 common ancestor was calculated for each tryptic peptide. The proteomics data from this study  
997 are available from

998 ([https://github.com/mazmanianlab/Griffiths\\_Yoo\\_et\\_al/tree/main/proteomics](https://github.com/mazmanianlab/Griffiths_Yoo_et_al/tree/main/proteomics)).

999

#### 1000 **3' mRNA sequencing**

1001 Procedures are described in [dx.doi.org/10.17504/protocols.io.bzqbp5sn](https://doi.org/10.17504/protocols.io.bzqbp5sn).

#### 1002 **Tissue collection and RNA extraction**

1003 Mice were cervically dislocated and the GI tract was removed. 1 cm of tissue above and below  
1004 the cecum were dissected and cleaned to represent tissue from the distal SI and proximal colon,  
1005 respectively. Tissue was homogenized in TRIzol (ThermoFisher Scientific, Waltham, MA- Cat.  
1006 No. 15596018) solution using a bead-based homogenizing method, and total RNA was  
1007 extracted using chloroform per manufacturer's instructions.

#### 1008 **Library preparation, sequencing, and analysis**

1009 The cDNA libraries were prepared using the QuantSeq 3'mRNA-Seq Library Prep Kit FWD for  
1010 Illumina (Lexogen, Greenland, NH) supplemented with UMI (unique molecular index) as per the  
1011 manufacturer's instructions. Briefly, total RNA was reverse transcribed using oligo (dT) primers.  
1012 The second cDNA strand was synthesized by random priming, in a manner such that DNA  
1013 polymerase is efficiently stopped when reaching the next hybridized random primer, so only the  
1014 fragment closest to the 3' end gets captured for later indexed adapter ligation and PCR  
1015 amplification. UMIs were incorporated to the first 6 bases of each read, followed by 4 bases of  
1016 spacer sequences. UMIs are used to eliminate possible PCR duplicates in sequencing datasets  
1017 and therefore facilitate unbiased gene expression profiling. The basic principle behind the UMI  
1018 deduplication step is to collapse reads with identical mapping coordinates and UMI sequences.  
1019 This step helps increase the accuracy of sequencing read counts for downstream analysis of  
1020 gene expression levels. The processed libraries were assessed for size distribution and  
1021 concentration using the Bioanalyzer High Sensitivity DNA Kit (Agilent Technologies, Santa  
1022 Clara, CA- Cat. No. 5067-4626 and -4627). Pooled libraries were diluted to 2 nM in EB buffer  
1023 (Qiagen, Hilden, Germany, Cat. No. 19086) and then denatured using the Illumina protocol. The  
1024 libraries were pooled and diluted to 2 nM using 10 mM Tris-HCl, pH 8.5 and then denatured  
1025 using the Illumina protocol. The denatured libraries were diluted to 10 pM with pre-chilled  
1026 hybridization buffer and loaded onto an Illumina MiSeq v3 flow cell for 150 cycles using a single-  
1027 read recipe according to the manufacturer's instructions. Single-end 75 bp reads (max 4.5M  
1028 reads) were obtained. De-multiplexed sequencing reads were generated using Illumina  
1029 BaseSpace.

1030

1031 UMI specific workflows that were developed and distributed by Lexogen were used to extract  
1032 reads that are free from PCR artifacts (i.e., deduplication). First, the umi2index tool was used to

1033 add the 6 nucleotide UMI sequence to the identifier of each read and trim the UMI from the start  
1034 of each read. This generated a new FASTQ file, which was then processed through trimming  
1035 and alignment. Second, after the quality and polyA trimming by BBDuk<sup>115</sup> (Bestus  
1036 Bioinformaticus Duk, RRID:SCR\_016969, [https://jgi.doe.gov/data-and-tools/bbtools/bb-tools-  
1037 user-guide/bbdduk-guide/](https://jgi.doe.gov/data-and-tools/bbtools/bb-tools-user-guide/bbdduk-guide/)) and alignment by HISAT2 (version 2.1.0, RRID:SCR\_015530,  
1038 <https://daehwankimlab.github.io/hisat2/>)<sup>116</sup>, the mapped reads were collapsed according to the  
1039 UMI sequence of each read. Reads were collapsed if they had the same mapping coordinates  
1040 (CIGAR string) and identical UMI sequences. Collapsing reads in this manner removes PCR  
1041 duplicates. Read counts were calculated using HTSeq (RRID:SCR\_005514,  
1042 [https://htseq.readthedocs.io/en/release\\_0.9.1/](https://htseq.readthedocs.io/en/release_0.9.1/))<sup>117</sup> by supplementing Ensembl gene annotation  
1043 (GRCm38.78). Raw read counts were run through ShinySeq to obtain differentially expressed  
1044 genes and downstream gene ontology analyses<sup>139</sup>. The RNAseq data from this study are  
1045 available from  
1046 ([https://github.com/mazmanianlab/Griffiths\\_Yoo\\_et\\_al/tree/main/RNAseq](https://github.com/mazmanianlab/Griffiths_Yoo_et_al/tree/main/RNAseq)).  
1047

### 1048 **Whole Gut Transit Time, Fecal Water Content, and Fecal Output**

1049 Procedures are described in [dx.doi.org/10.17504/protocols.io.36wqq3p1x1k5/v1](https://doi.org/10.17504/protocols.io.36wqq3p1x1k5/v1).  
1050 6% (w/v) carmine red (Sigma-Aldrich, St. Louis, MO) with 0.5% methylcellulose (Sigma-Aldrich)  
1051 was dissolved and autoclaved prior to use. ChAT-Cre and TH-Cre mice were administered C21  
1052 (3 mg/kg) intraperitoneally, and subsequently orally gavaged with 150  $\mu$ L of carmine red  
1053 solution. Mice were single-housed with no bedding for the duration of the experiment, and  
1054 animals were not fasted beforehand. Over the 5 hours following gavage, the time of expulsion  
1055 was recorded for each fecal pellet, and each pellet was collected in pre-weighed, 1.5 mL  
1056 microcentrifuge tube. Each pellet collected was checked for the presence of carmine red, and  
1057 the time of initial carmine red pellet expulsion was recorded as GI transit time. The mass of  
1058 collected fecal pellets was determined, and pellets were left to dry in an 80 °C oven for 2 days  
1059 before weighing the desiccated pellets and calculating the pellets' initial water content. Fecal  
1060 output rate for each mouse was calculated as the total number of pellets expelled during the 5  
1061 hour time course post-C21 administration divided by the time the last fecal pellet was expelled.  
1062

### 1063 **Colonic Migrating Motor Complexes in *Ex Vivo* Intestinal Preparations**

1064 Procedures are described in [dx.doi.org/10.17504/protocols.io.n92ldm61nl5b/v1](https://doi.org/10.17504/protocols.io.n92ldm61nl5b/v1).  
1065 Intact colons were dissected from cervically-dislocated ChAT-Cre and TH-Cre mice, flushed and  
1066 placed in pre-oxygenated (95% O<sub>2</sub>, 5% CO<sub>2</sub>) Krebs-Henseleit solution at RT. Proximal and  
1067 distal ends were cannulated to 2 mm diameter tubes and secured in the center of an organ bath  
1068 with continuously oxygenated Krebs-Henseleit solution at 37 °C. Syringe pumps were  
1069 connected to the inlet and outlet tubes to maintain a flow of solution at a rate of 500  $\mu$ L/min  
1070 through the colon. The system was allowed to equilibrate for 30 minutes before recording.  
1071 Baseline recordings were taken for 30 minutes, then the Krebs solution in the organ bath was  
1072 briefly removed, mixed with C21 to a final concentration of 2  $\mu$ M, and replaced in the organ  
1073 bath. Recordings were taken for another 30 minutes.  
1074

### 1075 **Quantification and Statistical Analysis**

1076 Statistical methodologies and software used for performing various types of multi-omic analysis  
1077 in this work are cited where appropriate in the STAR Methods text. The p-value calculations for  
1078 viral transduction, microbiome differences, gastrointestinal function, and animal welfare were  
1079 done using Prism GraphPad v.9.2.0. The specific statistical test used for each figure is denoted  
1080 in the figure legends. Error bars represent the standard error of the mean unless otherwise  
1081 stated.



1082 **Supplemental Video and Table Legends**

1083

1084 **Table S1 - Extended GNPS Annotations of Metabolite Network Nodes (Related to Figure**  
1085 **3).**

1086 Extended annotations for networked (bold) MS/MS spectra from luminal cecal contents of  
1087 activated TH<sup>+</sup> and ChAT<sup>+</sup> mice in Figures 3C and 3D, respectively.

1088 Source Data Table S1

1089 [https://github.com/mazmanianlab/Griffiths\\_Yoo\\_et\\_al/blob/main/metabolomics/Table\\_S1-](https://github.com/mazmanianlab/Griffiths_Yoo_et_al/blob/main/metabolomics/Table_S1-Extended_GNPS_annotations_of_Metabolite_Network_Notes_related_to_figure_3.xlsx)  
1090 [Extended\\_GNPS\\_annotations\\_of\\_Metabolite\\_Network\\_Notes\\_related\\_to\\_figure\\_3.xlsx](https://github.com/mazmanianlab/Griffiths_Yoo_et_al/blob/main/metabolomics/Table_S1-Extended_GNPS_annotations_of_Metabolite_Network_Notes_related_to_figure_3.xlsx)

1091

1092 **Table S2 - Gene Set Enrichment Analysis of Gene Ontology (GO) Terms (Related to**  
1093 **Figure 5).**

1094 Gene set enrichment analysis of gene ontology (GO) terms that are upregulated in the distal SI  
1095 and proximal colon of activated ChAT<sup>+</sup> and TH<sup>+</sup> mice.

1096 Source Data Table S2

1097 [https://github.com/mazmanianlab/Griffiths\\_Yoo\\_et\\_al/blob/main/RNAseq/Table\\_S2-](https://github.com/mazmanianlab/Griffiths_Yoo_et_al/blob/main/RNAseq/Table_S2-Gene_Set_Enrichment_Analysis_of_GO_related_to_figure_5.xlsx)  
1098 [Gene\\_Set\\_Enrichment\\_Analysis\\_of\\_GO\\_related\\_to\\_figure\\_5.xlsx](https://github.com/mazmanianlab/Griffiths_Yoo_et_al/blob/main/RNAseq/Table_S2-Gene_Set_Enrichment_Analysis_of_GO_related_to_figure_5.xlsx)

1099

1100 **Table S3 – Genes Related to T helper responses (Related to Figure 5).**

1101 List of genes in the transcriptomics dataset associated with T helper responses.

1102 Source Data Table S3

1103 [https://github.com/mazmanianlab/Griffiths\\_Yoo\\_et\\_al/blob/main/RNAseq/Table\\_S3-](https://github.com/mazmanianlab/Griffiths_Yoo_et_al/blob/main/RNAseq/Table_S3-Genes_Related_to_T_Helper_Responses.xlsx)  
1104 [Genes\\_Related\\_to\\_T\\_Helper\\_Responses.xlsx](https://github.com/mazmanianlab/Griffiths_Yoo_et_al/blob/main/RNAseq/Table_S3-Genes_Related_to_T_Helper_Responses.xlsx)

1105

1106 **Table S4 – Annotations of Colonic Migrating Motor Complexes (Related to Figure 6)**

1107 Video annotations of CMMCs in *ex vivo* colonic preparations from ChAT<sup>+</sup> and TH<sup>+</sup> mice at  
1108 baseline and during activation.

1109 Source Data Table S4

1110 [https://github.com/mazmanianlab/Griffiths\\_Yoo\\_et\\_al/blob/main/ex\\_vivo\\_motility/Table](https://github.com/mazmanianlab/Griffiths_Yoo_et_al/blob/main/ex_vivo_motility/Table_S4%E2%80%93Annotations_of_Colonic_Migrating_Motor_Complexes_Related_to_figure_6.xlsx)  
1111 [S4%E2%80%93Annotations\\_of\\_Colonic\\_Migrating\\_Motor\\_Complexes\\_Related\\_to\\_figu](https://github.com/mazmanianlab/Griffiths_Yoo_et_al/blob/main/ex_vivo_motility/Table_S4%E2%80%93Annotations_of_Colonic_Migrating_Motor_Complexes_Related_to_figure_6.xlsx)  
1112 [re\\_6.xlsx](https://github.com/mazmanianlab/Griffiths_Yoo_et_al/blob/main/ex_vivo_motility/Table_S4%E2%80%93Annotations_of_Colonic_Migrating_Motor_Complexes_Related_to_figure_6.xlsx)

1113

1114 **Video S1 – Calcium Imaging of ChAT<sup>+</sup> activated Gut Neurons (Related to Figure S5)**

1115 Video of *in vivo* calcium imaging of GCaMP6f-expressing ChAT<sup>+</sup> activated neurons in the  
1116 myenteric plexus at 5 Hz following C21 administration.

1117 Source Data Video S1

1118 [https://github.com/mazmanianlab/Griffiths\\_Yoo\\_et\\_al/blob/main/ENS%20quantification/Video%](https://github.com/mazmanianlab/Griffiths_Yoo_et_al/blob/main/ENS%20quantification/Video%20Supplement%201-%20GCaMP6F%20at%205Hz.avi)  
1119 [20Supplement%201-%20GCaMP6F%20at%205Hz.avi](https://github.com/mazmanianlab/Griffiths_Yoo_et_al/blob/main/ENS%20quantification/Video%20Supplement%201-%20GCaMP6F%20at%205Hz.avi)

1120

1121 **REFERENCES**

- 1122 1. Furness JB. *The Enteric Nervous System*. Wiley; 2008.  
1123 <https://books.google.com/books?id=pvkdNHh16cC>
- 1124 2. Rao M, Gershon MD. The bowel and beyond: the enteric nervous system in  
1125 neurological disorders. *Nat Rev Gastroenterol Hepatol*. 2016;13(9):517-528.  
1126 doi:10.1038/nrgastro.2016.107
- 1127 3. Grundy D, Brookes S. *Neural Control of Gastrointestinal Function*. Morgan &  
1128 Claypool Life Science Publishers; 2011.  
1129 <https://books.google.com/books?id=Nv2BMJk6XHwC>
- 1130 4. Furness JB, Callaghan BP, Rivera LR, Cho HJ. The enteric nervous system and  
1131 gastrointestinal innervation: integrated local and central control. *Adv Exp Med Biol*.  
1132 2014;817:39-71. doi:10.1007/978-1-4939-0897-4\_3
- 1133 5. Schneider S, Wright CM, Heuckeroth RO. Unexpected Roles for the Second Brain:  
1134 Enteric Nervous System as Master Regulator of Bowel Function. *Annu Rev*  
1135 *Physiol*. 2019;81:235-259. doi:10.1146/annurev-physiol-021317-121515
- 1136 6. Gabanyi I, Muller PA, Feighery L, Oliveira TY, Costa-Pinto FA, Mucida D. Neuro-  
1137 immune Interactions Drive Tissue Programming in Intestinal Macrophages. *Cell*.  
1138 2016;164(3):378-391. doi:10.1016/j.cell.2015.12.023
- 1139 7. Muller PA, Koscsó B, Rajani GM, et al. Crosstalk between muscularis  
1140 macrophages and enteric neurons regulates gastrointestinal motility. *Cell*.  
1141 2014;158(2):300-313. doi:10.1016/j.cell.2014.04.050
- 1142 8. Bravo JA, Forsythe P, Chew MV, et al. Ingestion of Lactobacillus strain regulates  
1143 emotional behavior and central GABA receptor expression in a mouse via the  
1144 vagus nerve. *Proc Natl Acad Sci*. 2011;108(38):16050-16055.  
1145 doi:10.1073/pnas.1102999108
- 1146 9. Kaelberer MM, Buchanan KL, Klein ME, et al. A gut-brain neural circuit for nutrient  
1147 sensory transduction. *Science*. 2018;361(6408). doi:10.1126/science.aat5236
- 1148 10. Jarret A, Jackson R, Duizer C, et al. Enteric Nervous System-Derived IL-18  
1149 Orchestrates Mucosal Barrier Immunity. *Cell*. 2020;180(1):50-63.e12.  
1150 doi:10.1016/j.cell.2019.12.016
- 1151 11. Seillet C, Luong K, Tellier J, et al. The neuropeptide VIP confers anticipatory  
1152 mucosal immunity by regulating ILC3 activity. *Nat Immunol*. 2020;21(2):168-177.  
1153 doi:10.1038/s41590-019-0567-y
- 1154 12. Talbot J, Hahn P, Kroehling L, Nguyen H, Li D, Littman DR. Feeding-dependent  
1155 VIP neuron–ILC3 circuit regulates the intestinal barrier. *Nature*.  
1156 2020;579(7800):575-580. doi:10.1038/s41586-020-2039-9

- 1157 13. Lai NY, Musser MA, Pinho-Ribeiro FA, et al. Gut-Innervating Nociceptor Neurons  
1158 Regulate Peyer's Patch Microfold Cells and SFB Levels to Mediate Salmonella  
1159 Host Defense. *Cell*. 2020;180(1):33-49.e22. doi:10.1016/j.cell.2019.11.014
- 1160 14. Matheis F, Muller PA, Graves CL, et al. Adrenergic Signaling in Muscularis  
1161 Macrophages Limits Infection-Induced Neuronal Loss. *Cell*. 2020;180(1):64-  
1162 78.e16. doi:10.1016/j.cell.2019.12.002
- 1163 15. Nezami BG, Srinivasan S. Enteric nervous system in the small intestine:  
1164 pathophysiology and clinical implications. *Curr Gastroenterol Rep*. 2010;12(5):358-  
1165 365. doi:10.1007/s11894-010-0129-9
- 1166 16. Qu ZD, Thacker M, Castelucci P, Bagyánszki M, Epstein ML, Furness JB.  
1167 Immunohistochemical analysis of neuron types in the mouse small intestine. *Cell*  
1168 *Tissue Res*. 2008;334(2):147-161. doi:10.1007/s00441-008-0684-7
- 1169 17. Furness JB. The enteric nervous system and neurogastroenterology. *Nat Rev*  
1170 *Gastroenterol Hepatol*. 2012;9(5):286-294. doi:10.1038/nrgastro.2012.32
- 1171 18. Hennig GW, Gould TW, Koh SD, et al. Use of Genetically Encoded Calcium  
1172 Indicators (GECIs) Combined with Advanced Motion Tracking Techniques to  
1173 Examine the Behavior of Neurons and Glia in the Enteric Nervous System of the  
1174 Intact Murine Colon. *Front Cell Neurosci*. 2015;9:436.  
1175 doi:10.3389/fncel.2015.00436
- 1176 19. Niesler B, Kuerten S, Demir IE, Schäfer KH. Disorders of the enteric nervous  
1177 system — a holistic view. *Nat Rev Gastroenterol Hepatol*. 2021;18(6):393-410.  
1178 doi:10.1038/s41575-020-00385-2
- 1179 20. Nezami BG, Srinivasan S. Enteric nervous system in the small intestine:  
1180 pathophysiology and clinical implications. *Curr Gastroenterol Rep*. 2010;12(5):358-  
1181 365. doi:10.1007/s11894-010-0129-9
- 1182 21. Qu ZD, Thacker M, Castelucci P, Bagyánszki M, Epstein ML, Furness JB.  
1183 Immunohistochemical analysis of neuron types in the mouse small intestine. *Cell*  
1184 *Tissue Res*. 2008;334(2):147-161. doi:10.1007/s00441-008-0684-7
- 1185 22. Lott EL, Jones EB. Cholinergic Toxicity. In: *StatPearls*. StatPearls Publishing; 2023.
- 1186 23. Monane M, Avorn J, Beers MH, Everitt DE. Anticholinergic drug use and bowel  
1187 function in nursing home patients. *Arch Intern Med*. 1993;153(5):633-638.
- 1188 24. Fung C, Koussoulas K, Unterweger P, Allen AM, Bornstein JC, Foong JPP.  
1189 Cholinergic Submucosal Neurons Display Increased Excitability Following in Vivo  
1190 Cholera Toxin Exposure in Mouse Ileum. *Front Physiol*. 2018;9:260.  
1191 doi:10.3389/fphys.2018.00260

- 1192 25. Wang H, Foong JPP, Harris NL, Bornstein JC. Enteric neuroimmune interactions  
1193 coordinate intestinal responses in health and disease. *Mucosal Immunol.*  
1194 2022;15(1):27-39. doi:10.1038/s41385-021-00443-1
- 1195 26. Li ZS, Schmauss C, Cuenca A, Ratcliffe E, Gershon MD. Physiological modulation  
1196 of intestinal motility by enteric dopaminergic neurons and the D2 receptor: analysis  
1197 of dopamine receptor expression, location, development, and function in wild-type  
1198 and knock-out mice. *J Neurosci Off J Soc Neurosci.* 2006;26(10):2798-2807.  
1199 doi:10.1523/JNEUROSCI.4720-05.2006
- 1200 27. Baumuratov AS, Antony PMA, Ostaszewski M, et al. Enteric neurons from  
1201 Parkinson's disease patients display ex vivo aberrations in mitochondrial structure.  
1202 *Sci Rep.* 2016;6(1):33117. doi:10.1038/srep33117
- 1203 28. McQuade RM, Singleton LM, Wu H, et al. The association of enteric neuropathy  
1204 with gut phenotypes in acute and progressive models of Parkinson's disease. *Sci*  
1205 *Rep.* 2021;11(1):7934. doi:10.1038/s41598-021-86917-5
- 1206 29. Mittal R, Debs LH, Patel AP, et al. Neurotransmitters: The Critical Modulators  
1207 Regulating Gut-Brain Axis. *J Cell Physiol.* 2017;232(9):2359-2372.  
1208 doi:10.1002/jcp.25518
- 1209 30. Chan KY, Jang MJ, Yoo BB, et al. Engineered AAVs for efficient noninvasive gene  
1210 delivery to the central and peripheral nervous systems. *Nat Neurosci.*  
1211 2017;20(8):1172-1179. doi:10.1038/nn.4593
- 1212 31. Wess J, Nakajima K, Jain S. Novel designer receptors to probe GPCR signaling  
1213 and physiology. *Trends Pharmacol Sci.* 2013;34(7):385-392.  
1214 doi:10.1016/j.tips.2013.04.006
- 1215 32. Furness JB. The organisation of the autonomic nervous system: peripheral  
1216 connections. *Auton Neurosci Basic Clin.* 2006;130(1-2):1-5.  
1217 doi:10.1016/j.autneu.2006.05.003
- 1218 33. Hamnett R, Dershowitz LB, Sampathkumar V, et al. Regional cytoarchitecture of  
1219 the adult and developing mouse enteric nervous system. *Curr Biol CB.*  
1220 2022;32(20):4483-4492.e5. doi:10.1016/j.cub.2022.08.030
- 1221 34. Hama H, Hioki H, Namiki K, et al. ScaleS: an optical clearing palette for biological  
1222 imaging. *Nat Neurosci.* 2015;18(10):1518-1529. doi:10.1038/nn.4107
- 1223 35. Treweek JB, Chan KY, Flytzanis NC, et al. Whole-body tissue stabilization and  
1224 selective extractions via tissue-hydrogel hybrids for high-resolution intact circuit  
1225 mapping and phenotyping. *Nat Protoc.* 2015;10(11):1860-1896.  
1226 doi:10.1038/nprot.2015.122

- 1227 36. Yang B, Treweek JB, Kulkarni RP, et al. Single-cell phenotyping within transparent  
1228 intact tissue through whole-body clearing. *Cell*. 2014;158(4):945-958.  
1229 doi:10.1016/j.cell.2014.07.017
- 1230 37. Deverman BE, Pravdo PL, Simpson BP, et al. Cre-dependent selection yields AAV  
1231 variants for widespread gene transfer to the adult brain. *Nat Biotechnol*.  
1232 2016;34(2):204-209. doi:10.1038/nbt.3440
- 1233 38. Chan KY, Jang MJ, Yoo BB, et al. Engineered AAVs for efficient noninvasive gene  
1234 delivery to the central and peripheral nervous systems. *Nat Neurosci*.  
1235 2017;20(8):1172-1179. doi:10.1038/nn.4593
- 1236 39. Haenraets K, Foster E, Johannssen H, et al. Spinal nociceptive circuit analysis with  
1237 recombinant adeno-associated viruses: the impact of serotypes and promoters. *J*  
1238 *Neurochem*. 2017;142(5):721-733. doi:10.1111/jnc.14124
- 1239 40. Jakob MO, Kofoed-Branzk M, Deshpande D, Murugan S, Klose CSN. An  
1240 Integrated View on Neuronal Subsets in the Peripheral Nervous System and Their  
1241 Role in Immunoregulation. *Front Immunol*. 2021;12:679055.  
1242 doi:10.3389/fimmu.2021.679055
- 1243 41. Tavares-Ferreira D, Shiers S, Ray PR, et al. Spatial transcriptomics of dorsal root  
1244 ganglia identifies molecular signatures of human nociceptors. *Sci Transl Med*.  
1245 2022;14(632):eabj8186. doi:10.1126/scitranslmed.abj8186
- 1246 42. Challis RC, Kumar SR, Chan KY, et al. Systemic AAV vectors for widespread and  
1247 targeted gene delivery in rodents. *Nat Protoc*. 2019;14(2):379-414.  
1248 doi:10.1038/s41596-018-0097-3
- 1249 43. Kaestner CL, Smith EH, Peirce SG, Hoover DB. Immunohistochemical analysis of  
1250 the mouse celiac ganglion: An integrative relay station of the peripheral nervous  
1251 system. *J Comp Neurol*. 2019;527(16):2742-2760. doi:10.1002/cne.24705
- 1252 44. Browning KN, Travagli RA. Central nervous system control of gastrointestinal  
1253 motility and secretion and modulation of gastrointestinal functions. *Compr Physiol*.  
1254 2014;4(4):1339-1368. doi:10.1002/cphy.c130055
- 1255 45. Thompson KJ, Khajehali E, Bradley SJ, et al. DREADD Agonist 21 Is an Effective  
1256 Agonist for Muscarinic-Based DREADDs in Vitro and in Vivo. *ACS Pharmacol*  
1257 *Transl Sci*. 2018;1(1):61-72. doi:10.1021/acsptsci.8b00012
- 1258 46. Segata N, Izard J, Waldron L, et al. Metagenomic biomarker discovery and  
1259 explanation. *Genome Biol*. 2011;12(6):R60. doi:10.1186/gb-2011-12-6-r60
- 1260 47. Wang M, Carver JJ, Phelan VV, et al. Sharing and community curation of mass  
1261 spectrometry data with Global Natural Products Social Molecular Networking. *Nat*  
1262 *Biotechnol*. 2016;34(8):828-837. doi:10.1038/nbt.3597



- 1263 48. Sumner LW, Amberg A, Barrett D, et al. Proposed minimum reporting standards for  
1264 chemical analysis Chemical Analysis Working Group (CAWG) Metabolomics  
1265 Standards Initiative (MSI). *Metabolomics Off J Metabolomic Soc.* 2007;3(3):211-  
1266 221. doi:10.1007/s11306-007-0082-2
- 1267 49. Aries V, Crowther JS, Drasar BS, Hill MJ. Degradation of bile salts by human  
1268 intestinal bacteria. *Gut.* 1969;10(7):575-576. doi:10.1136/gut.10.7.575
- 1269 50. Sakai K, Makino T, Kawai Y, Mutai M. Intestinal microflora and bile acids. Effect of  
1270 bile acids on the distribution of microflora and bile acid in the digestive tract of the  
1271 rat. *Microbiol Immunol.* 1980;24(3):187-196. doi:10.1111/j.1348-  
1272 0421.1980.tb00578.x
- 1273 51. Albenberg LG, Wu GD. Diet and the intestinal microbiome: associations, functions,  
1274 and implications for health and disease. *Gastroenterology.* 2014;146(6):1564-1572.  
1275 doi:10.1053/j.gastro.2014.01.058
- 1276 52. Jia L, Betters JL, Yu L. Niemann-pick C1-like 1 (NPC1L1) protein in intestinal and  
1277 hepatic cholesterol transport. *Annu Rev Physiol.* 2011;73:239-259.  
1278 doi:10.1146/annurev-physiol-012110-142233
- 1279 53. Rodríguez-Piñeiro AM, Bergström JH, Ermund A, et al. Studies of mucus in mouse  
1280 stomach, small intestine, and colon. II. Gastrointestinal mucus proteome reveals  
1281 Muc2 and Muc5ac accompanied by a set of core proteins. *Am J Physiol*  
1282 *Gastrointest Liver Physiol.* 2013;305(5):G348-356. doi:10.1152/ajpgi.00047.2013
- 1283 54. Matsushima S, Hori S, Matsuda M. Conversion of 4-aminobutyraldehyde to  
1284 gamma-aminobutyric acid in striatum treated with semicarbazide and kainic acid.  
1285 *Neurochem Res.* 1986;11(9):1313-1319. doi:10.1007/BF00966125
- 1286 55. Li W, Yu G, Liu Y, Sha L. Intrapancreatic Ganglia and Neural Regulation of  
1287 Pancreatic Endocrine Secretion. *Front Neurosci.* 2019;13.  
1288 doi:10.3389/fnins.2019.00021
- 1289 56. Donowitz M, Singh S, Salahuddin FF, et al. Proteome of murine jejunal brush  
1290 border membrane vesicles. *J Proteome Res.* 2007;6(10):4068-4079.  
1291 doi:10.1021/pr0701761
- 1292 57. McConnell RE, Benesh AE, Mao S, Tabb DL, Tyska MJ. Proteomic analysis of the  
1293 enterocyte brush border. *Am J Physiol Gastrointest Liver Physiol.*  
1294 2011;300(5):G914-926. doi:10.1152/ajpgi.00005.2011
- 1295 58. Latgé JP. The cell wall: a carbohydrate armour for the fungal cell. *Mol Microbiol.*  
1296 2007;66(2):279-290. doi:10.1111/j.1365-2958.2007.05872.x
- 1297 59. Wu YE, Pan L, Zuo Y, Li X, Hong W. Detecting Activated Cell Populations Using  
1298 Single-Cell RNA-Seq. *Neuron.* 2017;96(2):313-329.e6.  
1299 doi:10.1016/j.neuron.2017.09.026

- 1300 60. Bahrami S, Drabløs F. Gene regulation in the immediate-early response process.  
1301 *Adv Biol Regul.* 2016;62:37-49. doi:10.1016/j.jbior.2016.05.001
- 1302 61. Ramirez-Carrozzi VR, Braas D, Bhatt DM, et al. A unifying model for the selective  
1303 regulation of inducible transcription by CpG islands and nucleosome remodeling.  
1304 *Cell.* 2009;138(1):114-128. doi:10.1016/j.cell.2009.04.020
- 1305 62. Miano JM, Vlastic N, Tota RR, Stemerman MB. Smooth muscle cell immediate-  
1306 early gene and growth factor activation follows vascular injury. A putative in vivo  
1307 mechanism for autocrine growth. *Arterioscler Thromb J Vasc Biol.* 1993;13(2):211-  
1308 219. doi:10.1161/01.atv.13.2.211
- 1309 63. Flandez M, Guilmeau S, Blache P, Augenlicht LH. KLF4 regulation in intestinal  
1310 epithelial cell maturation. *Exp Cell Res.* 2008;314(20):3712-3723.  
1311 doi:10.1016/j.yexcr.2008.10.004
- 1312 64. Furness JB. The enteric nervous system and neurogastroenterology. *Nat Rev*  
1313 *Gastroenterol Hepatol.* 2012;9(5):286-294. doi:10.1038/nrgastro.2012.32
- 1314 65. Fung C, Koussoulas K, Unterweger P, Allen AM, Bornstein JC, Foong JPP.  
1315 Cholinergic Submucosal Neurons Display Increased Excitability Following in Vivo  
1316 Cholera Toxin Exposure in Mouse Ileum. *Front Physiol.* 2018;9:260.  
1317 doi:10.3389/fphys.2018.00260
- 1318 66. Monane M, Avorn J, Beers MH, Everitt DE. Anticholinergic drug use and bowel  
1319 function in nursing home patients. *Arch Intern Med.* 1993;153(5):633-638.
- 1320 67. Johnson CD, Barlow-Anacker AJ, Pierre JF, et al. Deletion of choline  
1321 acetyltransferase in enteric neurons results in postnatal intestinal dysmotility and  
1322 dysbiosis. *FASEB J Off Publ Fed Am Soc Exp Biol.* 2018;32(9):4744-4752.  
1323 doi:10.1096/fj.201701474RR
- 1324 68. Everard A, Belzer C, Geurts L, et al. Cross-talk between *Akkermansia muciniphila*  
1325 and intestinal epithelium controls diet-induced obesity. *Proc Natl Acad Sci.*  
1326 2013;110(22):9066-9071. doi:10.1073/pnas.1219451110
- 1327 69. Plovier H, Everard A, Druart C, et al. A purified membrane protein from  
1328 *Akkermansia muciniphila* or the pasteurized bacterium improves metabolism in  
1329 obese and diabetic mice. *Nat Med.* 2017;23(1):107-113. doi:10.1038/nm.4236
- 1330 70. Cekanaviciute E, Yoo BB, Runia TF, et al. Gut bacteria from multiple sclerosis  
1331 patients modulate human T cells and exacerbate symptoms in mouse models. *Proc*  
1332 *Natl Acad Sci U S A.* 2017;114(40):10713-10718. doi:10.1073/pnas.1711235114
- 1333 71. Jangi S, Gandhi R, Cox LM, et al. Alterations of the human gut microbiome in  
1334 multiple sclerosis. *Nat Commun.* 2016;7(1):12015. doi:10.1038/ncomms12015

- 1335 72. Olson CA, Vuong HE, Yano JM, Liang QY, Nusbaum DJ, Hsiao EY. The Gut  
1336 Microbiota Mediates the Anti-Seizure Effects of the Ketogenic Diet. *Cell*.  
1337 2018;173(7):1728-1741.e13. doi:10.1016/j.cell.2018.04.027
- 1338 73. de Aguiar Vallim TQ, Tarling EJ, Edwards PA. Pleiotropic roles of bile acids in  
1339 metabolism. *Cell Metab*. 2013;17(5):657-669. doi:10.1016/j.cmet.2013.03.013
- 1340 74. Kirwan WO, Smith AN, Mitchell WD, Falconer JD, Eastwood MA. Bile acids and  
1341 colonic motility in the rabbit and the human. *Gut*. 1975;16(11):894-902.  
1342 doi:10.1136/gut.16.11.894
- 1343 75. Watanabe M, Houten SM, Matakai C, et al. Bile acids induce energy expenditure by  
1344 promoting intracellular thyroid hormone activation. *Nature*. 2006;439(7075):484-  
1345 489. doi:10.1038/nature04330
- 1346 76. Fiorucci S, Biagioli M, Zampella A, Distrutti E. Bile Acids Activated Receptors  
1347 Regulate Innate Immunity. *Front Immunol*. 2018;9:1853.  
1348 doi:10.3389/fimmu.2018.01853
- 1349 77. McMillin M, DeMorrow S. Effects of bile acids on neurological function and disease.  
1350 *FASEB J Off Publ Fed Am Soc Exp Biol*. 2016;30(11):3658-3668.  
1351 doi:10.1096/fj.201600275R
- 1352 78. Begley M, Sleator RD, Gahan CGM, Hill C. Contribution of three bile-associated  
1353 loci, bsh, pva, and btlB, to gastrointestinal persistence and bile tolerance of *Listeria*  
1354 *monocytogenes*. *Infect Immun*. 2005;73(2):894-904. doi:10.1128/IAI.73.2.894-  
1355 904.2005
- 1356 79. Delpino MV, Marchesini MI, Estein SM, et al. A bile salt hydrolase of *Brucella*  
1357 *abortus* contributes to the establishment of a successful infection through the oral  
1358 route in mice. *Infect Immun*. 2007;75(1):299-305. doi:10.1128/IAI.00952-06
- 1359 80. Hofmann AF, Eckmann L. How bile acids confer gut mucosal protection against  
1360 bacteria. *Proc Natl Acad Sci U S A*. 2006;103(12):4333-4334.  
1361 doi:10.1073/pnas.0600780103
- 1362 81. Jones BV, Begley M, Hill C, Gahan CGM, Marchesi JR. Functional and  
1363 comparative metagenomic analysis of bile salt hydrolase activity in the human gut  
1364 microbiome. *Proc Natl Acad Sci*. 2008;105(36):13580-13585.  
1365 doi:10.1073/pnas.0804437105
- 1366 82. Sannasiddappa TH, Lund PA, Clarke SR. In Vitro Antibacterial Activity of  
1367 Unconjugated and Conjugated Bile Salts on *Staphylococcus aureus*. *Front*  
1368 *Microbiol*. 2017;8:1581. doi:10.3389/fmicb.2017.01581
- 1369 83. Drokhlyansky E, Smillie CS, Van Wittenberghe N, et al. The Human and Mouse  
1370 Enteric Nervous System at Single-Cell Resolution. *Cell*. 2020;182(6):1606-  
1371 1622.e23. doi:10.1016/j.cell.2020.08.003



- 1372 84. Bhavsar AS, Verma S, Lamba R, Lall CG, Koenigsknecht V, Rajesh A. Abdominal  
1373 manifestations of neurologic disorders. *Radiogr Rev Publ Radiol Soc N Am Inc.*  
1374 2013;33(1):135-153. doi:10.1148/rg.331125097
- 1375 85. Cersosimo MG, Raina GB, Pecci C, et al. Gastrointestinal manifestations in  
1376 Parkinson's disease: prevalence and occurrence before motor symptoms. *J Neurol.*  
1377 2013;260(5):1332-1338. doi:10.1007/s00415-012-6801-2
- 1378 86. Del Giudice E, Staiano A, Capano G, et al. Gastrointestinal manifestations in  
1379 children with cerebral palsy. *Brain Dev.* 1999;21(5):307-311. doi:10.1016/s0387-  
1380 7604(99)00025-x
- 1381 87. Pfeiffer RF. Gastrointestinal dysfunction in Parkinson's disease. *Lancet Neurol.*  
1382 2003;2(2):107-116. doi:10.1016/s1474-4422(03)00307-7
- 1383 88. Valicenti-McDermott MD, McVicar K, Cohen HJ, Wershil BK, Shinnar S.  
1384 Gastrointestinal symptoms in children with an autism spectrum disorder and  
1385 language regression. *Pediatr Neurol.* 2008;39(6):392-398.  
1386 doi:10.1016/j.pediatrneurol.2008.07.019
- 1387 89. Rajendran PS, Challis RC, Fowlkes CC, et al. Identification of peripheral neural  
1388 circuits that regulate heart rate using optogenetic and viral vector strategies. *Nat*  
1389 *Commun.* 2019;10(1):1944. doi:10.1038/s41467-019-09770-1
- 1390 90. Roy A, Guatimosim S, Prado VF, Gros R, Prado MAM. Cholinergic activity as a  
1391 new target in diseases of the heart. *Mol Med Camb Mass.* 2015;20(1):527-537.  
1392 doi:10.2119/molmed.2014.00125
- 1393 91. Mohanta SK, Yin C, Weber C, et al. Cardiovascular Brain Circuits. *Circ Res.*  
1394 2023;132(11):1546-1565. doi:10.1161/CIRCRESAHA.123.322791
- 1395 92. Finneran DJ, Njoku IP, Flores-Pazarin D, et al. Toward Development of Neuron  
1396 Specific Transduction After Systemic Delivery of Viral Vectors. *Front Neurol.*  
1397 2021;12. doi:10.3389/fneur.2021.685802
- 1398 93. Kügler S, Kilic E, Bähr M. Human synapsin 1 gene promoter confers highly neuron-  
1399 specific long-term transgene expression from an adenoviral vector in the adult rat  
1400 brain depending on the transduced area. *Gene Ther.* 2003;10(4):337-347.  
1401 doi:10.1038/sj.gt.3301905
- 1402 94. Moran GW, Leslie FC, Levison SE, Worthington J, McLaughlin JT. Enteroendocrine  
1403 cells: neglected players in gastrointestinal disorders? *Ther Adv Gastroenterol.*  
1404 2008;1(1):51-60. doi:10.1177/1756283X08093943
- 1405 95. Bolyen E, Rideout JR, Dillon MR, et al. Reproducible, interactive, scalable and  
1406 extensible microbiome data science using QIIME 2. *Nat Biotechnol.*  
1407 2019;37(8):852-857. doi:10.1038/s41587-019-0209-9

- 1408 96. Lindeberg J, Usoskin D, Bengtsson H, et al. Transgenic expression of Cre  
1409 recombinase from the tyrosine hydroxylase locus. *Genes N Y N* 2000.  
1410 2004;40(2):67-73. doi:10.1002/gene.20065
- 1411 97. Schindelin J, Arganda-Carreras I, Frise E, et al. Fiji: an open-source platform for  
1412 biological-image analysis. *Nat Methods*. 2012;9(7):676-682.  
1413 doi:10.1038/nmeth.2019
- 1414 98. Langmead B, Salzberg SL. Fast gapped-read alignment with Bowtie 2. *Nat*  
1415 *Methods*. 2012;9(4):357-359. doi:10.1038/nmeth.1923
- 1416 99. Franzosa EA, Mclver LJ, Rahnavard G, et al. Species-level functional profiling of  
1417 metagenomes and metatranscriptomes. *Nat Methods*. 2018;15(11):962-968.  
1418 doi:10.1038/s41592-018-0176-y
- 1419 100. Suzek BE, Huang H, McGarvey P, Mazumder R, Wu CH. UniRef: comprehensive  
1420 and non-redundant UniProt reference clusters. *Bioinforma Oxf Engl*.  
1421 2007;23(10):1282-1288. doi:10.1093/bioinformatics/btm098
- 1422 101. Pluskal T, Castillo S, Villar-Briones A, Orešič M. MZmine 2: Modular framework for  
1423 processing, visualizing, and analyzing mass spectrometry-based molecular profile  
1424 data. *BMC Bioinformatics*. 2010;11(1):395. doi:10.1186/1471-2105-11-395
- 1425 102. Xia J, Psychogios N, Young N, Wishart DS. MetaboAnalyst: a web server for  
1426 metabolomic data analysis and interpretation. *Nucleic Acids Res*. 2009;37(Web  
1427 Server issue):W652-660. doi:10.1093/nar/gkp356
- 1428 103. Shannon P, Markiel A, Ozier O, et al. Cytoscape: a software environment for  
1429 integrated models of biomolecular interaction networks. *Genome Res*.  
1430 2003;13(11):2498-2504. doi:10.1101/gr.1239303
- 1431 104. The UniProt Consortium. UniProt: a worldwide hub of protein knowledge. *Nucleic*  
1432 *Acids Res*. 2019;47(D1):D506-D515. doi:10.1093/nar/gky1049
- 1433 105. Park SKR, Jung T, Thuy-Boun PS, Wang AY, Yates JRI, Wolan DW. ComPIL 2.0:  
1434 An Updated Comprehensive Metaproteomics Database. *J Proteome Res*.  
1435 2019;18(2):616-622. doi:10.1021/acs.jproteome.8b00722
- 1436 106. Xu T, Venable JD, Park SK, et al. ProLuCID, a fast and sensitive tandem mass  
1437 spectra-based protein identification program. In: *Molecular & Cellular Proteomics*.  
1438 Vol 5. AMER SOC BIOCHEMISTRY MOLECULAR BIOLOGY INC 9650  
1439 ROCKVILLE PIKE, BETHESDA ...; 2006:S174-S174.
- 1440 107. Xu T, Park SK, Venable JD, et al. ProLuCID: An improved SEQUEST-like algorithm  
1441 with enhanced sensitivity and specificity. *J Proteomics*. 2015;129:16-24.  
1442 doi:10.1016/j.jprot.2015.07.001

- 1443 108. Cociorva D, L Tabb D, Yates JR. Validation of tandem mass spectrometry  
1444 database search results using DTASelect. *Curr Protoc Bioinforma*. 2007;Chapter  
1445 13:Unit 13.4. doi:10.1002/0471250953.bi1304s16
- 1446 109. Tabb DL, McDonald WH, Yates JR. DTASelect and Contrast: □ Tools for  
1447 Assembling and Comparing Protein Identifications from Shotgun Proteomics. *J*  
1448 *Proteome Res*. 2002;1(1):21-26. doi:10.1021/pr015504q
- 1449 110. Fu L, Niu B, Zhu Z, Wu S, Li W. CD-HIT: accelerated for clustering the next-  
1450 generation sequencing data. *Bioinforma Oxf Engl*. 2012;28(23):3150-3152.  
1451 doi:10.1093/bioinformatics/bts565
- 1452 111. Li W, Jaroszewski L, Godzik A. Clustering of highly homologous sequences to  
1453 reduce the size of large protein databases. *Bioinforma Oxf Engl*. 2001;17(3):282-  
1454 283. doi:10.1093/bioinformatics/17.3.282
- 1455 112. Love MI, Huber W, Anders S. Moderated estimation of fold change and dispersion  
1456 for RNA-seq data with DESeq2. *Genome Biol*. 2014;15(12):550.  
1457 doi:10.1186/s13059-014-0550-8
- 1458 113. Zhang X, Smits AH, van Tilburg GB, Ovaa H, Huber W, Vermeulen M. Proteome-  
1459 wide identification of ubiquitin interactions using UblA-MS. *Nat Protoc*.  
1460 2018;13(3):530-550. doi:10.1038/nprot.2017.147
- 1461 114. Szklarczyk D, Gable AL, Lyon D, et al. STRING v11: protein-protein association  
1462 networks with increased coverage, supporting functional discovery in genome-wide  
1463 experimental datasets. *Nucleic Acids Res*. 2019;47(D1):D607-D613.  
1464 doi:10.1093/nar/gky1131
- 1465 115. Bushnell B, Rood J, Singer E. BBMerge - Accurate paired shotgun read merging  
1466 via overlap. *PloS One*. 2017;12(10):e0185056. doi:10.1371/journal.pone.0185056
- 1467 116. Kim D, Langmead B, Salzberg SL. HISAT: a fast spliced aligner with low memory  
1468 requirements. *Nat Methods*. 2015;12(4):357-360. doi:10.1038/nmeth.3317
- 1469 117. Anders S, Pyl PT, Huber W. HTSeq--a Python framework to work with high-  
1470 throughput sequencing data. *Bioinforma Oxf Engl*. 2015;31(2):166-169.  
1471 doi:10.1093/bioinformatics/btu638
- 1472 118. Marotz C, Amir A, Humphrey G, Gaffney J, Gogul G, Knight R. DNA extraction for  
1473 streamlined metagenomics of diverse environmental samples. *BioTechniques*.  
1474 2017;62(6):290-293. doi:10.2144/000114559
- 1475 119. Glenn TC, Nilsen RA, Kieran TJ, et al. Adapterama I: universal stubs and primers  
1476 for 384 unique dual-indexed or 147,456 combinatorially-indexed Illumina libraries  
1477 (iTru & iNext). *PeerJ*. 2019;7:e7755. doi:10.7717/peerj.7755

- 1478 120. Costello M, Fleharty M, Abreu J, et al. Characterization and remediation of sample  
1479 index swaps by non-redundant dual indexing on massively parallel sequencing  
1480 platforms. *BMC Genomics*. 2018;19(1):332. doi:10.1186/s12864-018-4703-0
- 1481 121. Sinha R, Stanley GM, Gulati GS, et al. Index switching causes “spreading-of-  
1482 signal” among multiplexed samples in Illumina HiSeq 4000 DNA sequencing.  
1483 *bioRxiv*. Published online 2017.  
1484 <https://api.semanticscholar.org/CorpusID:10764771>
- 1485 122. Gonzalez A, Navas-Molina JA, Kosciolk T, et al. Qiita: rapid, web-enabled  
1486 microbiome meta-analysis. *Nat Methods*. 2018;15(10):796-798.  
1487 doi:10.1038/s41592-018-0141-9
- 1488 123. Didion JP, Martin M, Collins FS. Atropos: specific, sensitive, and speedy trimming  
1489 of sequencing reads. *PeerJ*. 2017;5:e3720. doi:10.7717/peerj.3720
- 1490 124. Zhu Q, Mai U, Pfeiffer W, et al. Phylogenomics of 10,575 genomes reveals  
1491 evolutionary proximity between domains Bacteria and Archaea. *Nat Commun*.  
1492 2019;10(1):5477. doi:10.1038/s41467-019-13443-4
- 1493 125. Hillmann Benjamin, Al-Ghalith Gabriel A., Shields-Cutler Robin R., et al. Evaluating  
1494 the Information Content of Shallow Shotgun Metagenomics. *mSystems*.  
1495 2018;3(6):10.1128/msystems.00069-18. doi:10.1128/msystems.00069-18
- 1496 126. Martino Cameron, Morton James T., Marotz Clarisse A., et al. A Novel Sparse  
1497 Compositional Technique Reveals Microbial Perturbations. *mSystems*.  
1498 2019;4(1):10.1128/msystems.00016-19. doi:10.1128/msystems.00016-19
- 1499 127. Truong DT, Franzosa EA, Tickle TL, et al. MetaPhlan2 for enhanced metagenomic  
1500 taxonomic profiling. *Nat Methods*. 2015;12(10):902-903. doi:10.1038/nmeth.3589
- 1501 128. Caspi R, Billington R, Keseler IM, et al. The MetaCyc database of metabolic  
1502 pathways and enzymes - a 2019 update. *Nucleic Acids Res*. 2020;48(D1):D445-  
1503 D453. doi:10.1093/nar/gkz862
- 1504 129. Nothias LF, Petras D, Schmid R, et al. Feature-based molecular networking in the  
1505 GNPS analysis environment. *Nat Methods*. 2020;17(9):905-908.  
1506 doi:10.1038/s41592-020-0933-6
- 1507 130. Elias JE, Gygi SP. Target-decoy search strategy for increased confidence in large-  
1508 scale protein identifications by mass spectrometry. *Nat Methods*. 2007;4(3):207-  
1509 214. doi:10.1038/nmeth1019
- 1510 131. Peng J, Elias JE, Thoreen CC, Licklider LJ, Gygi SP. Evaluation of  
1511 Multidimensional Chromatography Coupled with Tandem Mass Spectrometry  
1512 (LC/LC-MS/MS) for Large-Scale Protein Analysis: □ The Yeast Proteome. *J*  
1513 *Proteome Res*. 2003;2(1):43-50. doi:10.1021/pr025556v

- 1514 132. Li W, Godzik A. Cd-hit: a fast program for clustering and comparing large sets of  
1515 protein or nucleotide sequences. *Bioinforma Oxf Engl*. 2006;22(13):1658-1659.  
1516 doi:10.1093/bioinformatics/btl158
- 1517 133. Park SK, Venable JD, Xu T, Yates JR. A quantitative analysis software tool for  
1518 mass spectrometry-based proteomics. *Nat Methods*. 2008;5(4):319-322.  
1519 doi:10.1038/nmeth.1195
- 1520 134. Huber W, von Heydebreck A, Sülthmann H, Poustka A, Vingron M. Variance  
1521 stabilization applied to microarray data calibration and to the quantification of  
1522 differential expression. *Bioinforma Oxf Engl*. 2002;18 Suppl 1:S96-104.  
1523 doi:10.1093/bioinformatics/18.suppl\_1.s96
- 1524 135. Gatto L, Lilley KS. MSnbase-an R/Bioconductor package for isobaric tagged mass  
1525 spectrometry data visualization, processing and quantitation. *Bioinforma Oxf Engl*.  
1526 2012;28(2):288-289. doi:10.1093/bioinformatics/btr645
- 1527 136. Ritchie ME, Phipson B, Wu D, et al. limma powers differential expression analyses  
1528 for RNA-sequencing and microarray studies. *Nucleic Acids Res*. 2015;43(7):e47-  
1529 e47. doi:10.1093/nar/gkv007
- 1530 137. Gurdeep Singh R, Tanca A, Palomba A, et al. Unipept 4.0: Functional Analysis of  
1531 Metaproteome Data. *J Proteome Res*. 2019;18(2):606-615.  
1532 doi:10.1021/acs.jproteome.8b00716
- 1533 138. Mesuere B, Debyser G, Aerts M, Devreese B, Vandamme P, Dawyndt P. The  
1534 Unipept metaproteomics analysis pipeline. *Proteomics*. 2015;15(8):1437-1442.  
1535 doi:10.1002/pmic.201400361
- 1536 139. Sundararajan Z, Knoll R, Hombach P, Becker M, Schultze JL, Ulas T. Shiny-Seq:  
1537 advanced guided transcriptome analysis. *BMC Res Notes*. 2019;12(1):432.  
1538 doi:10.1186/s13104-019-4471-1
- 1539



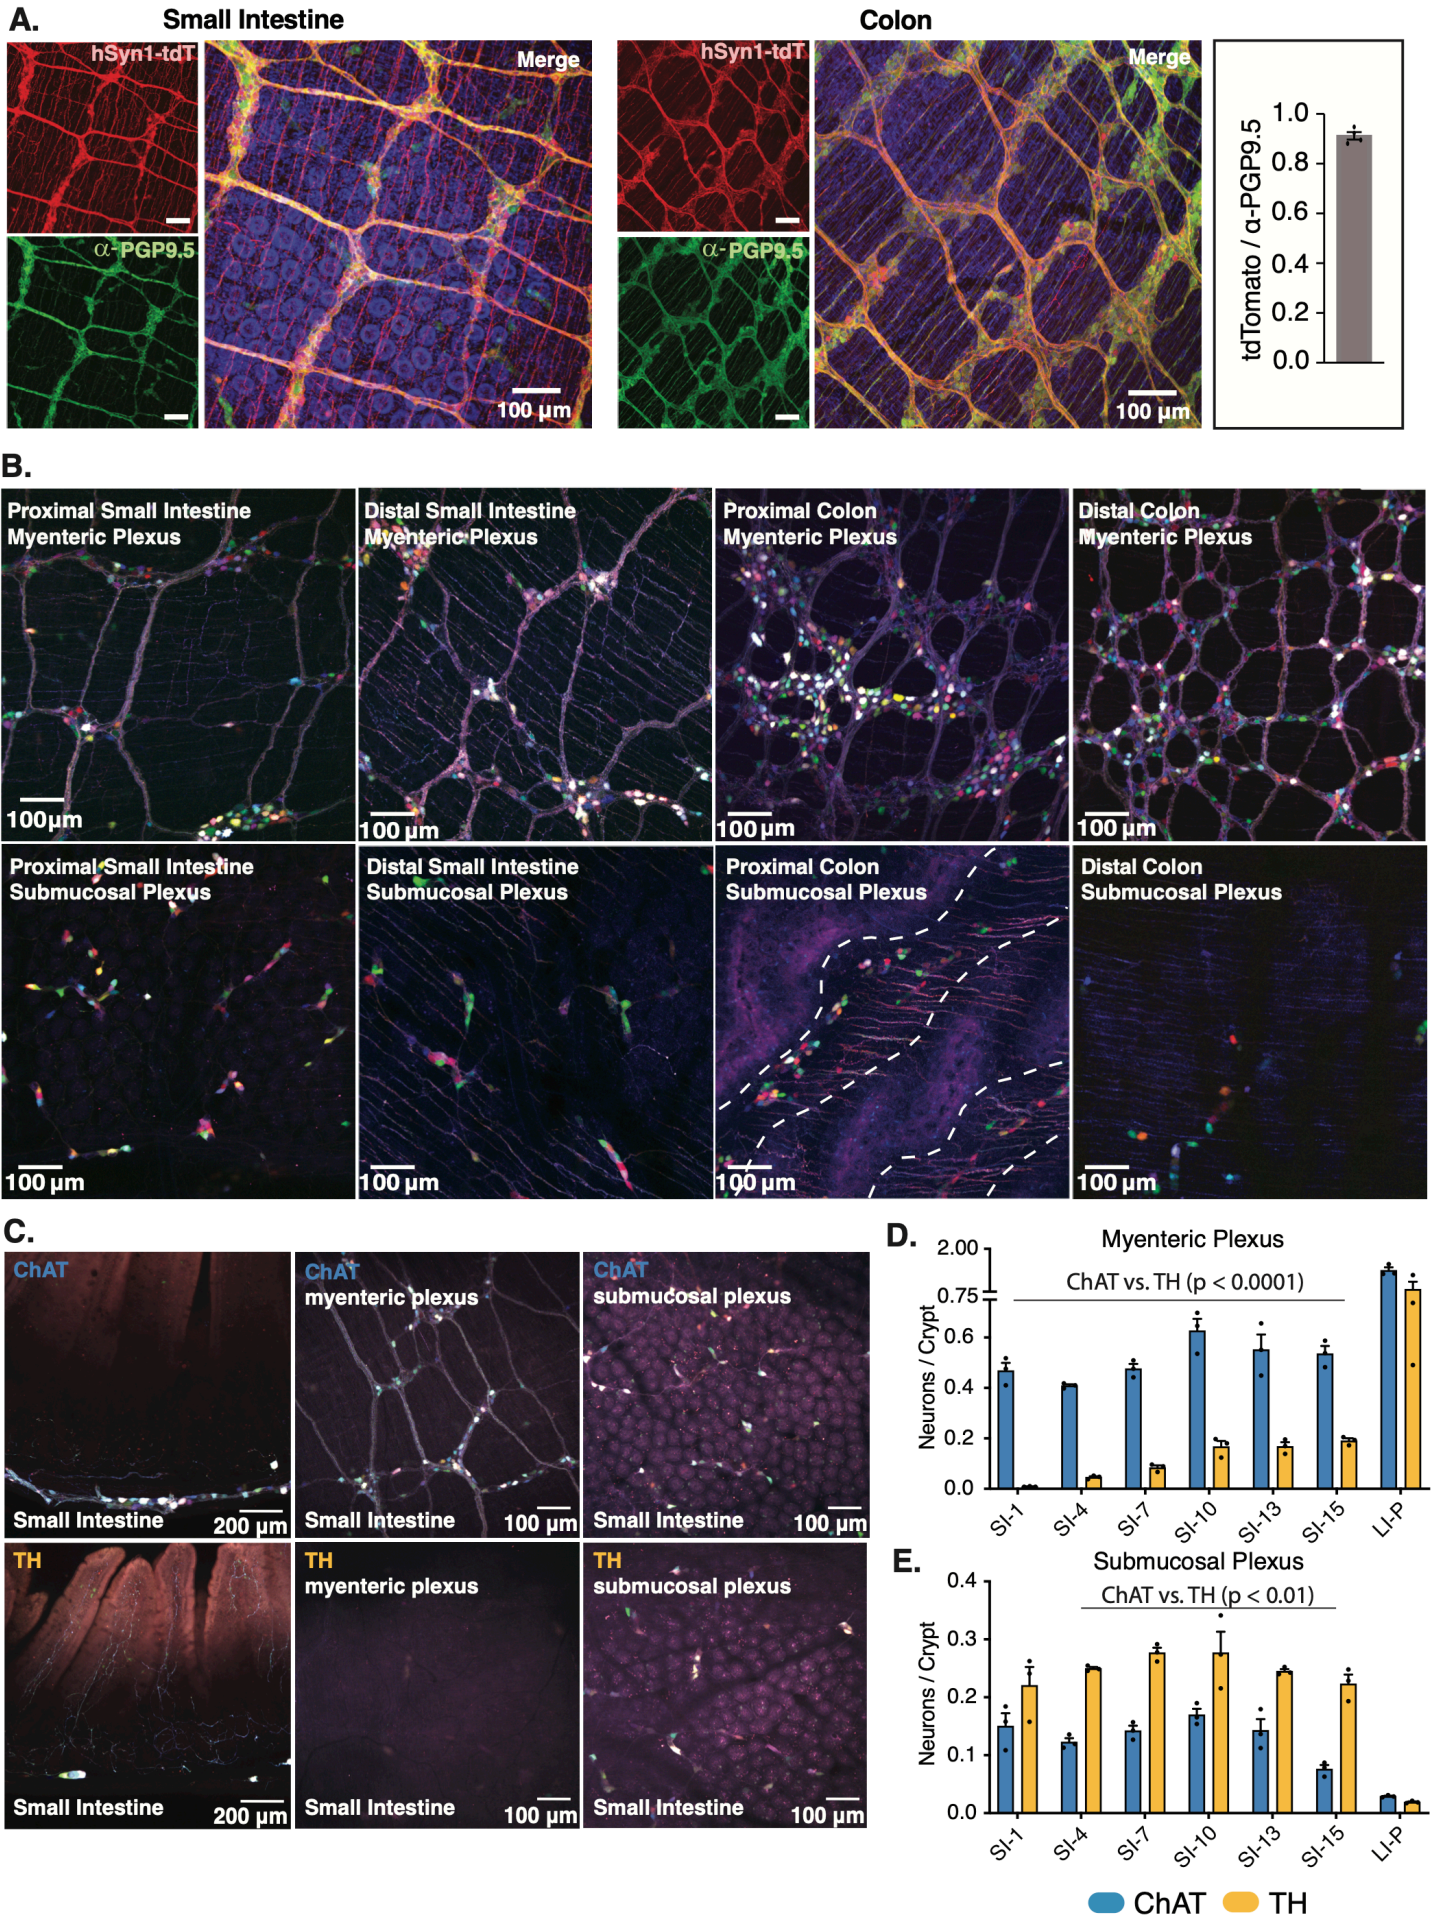



# Figure 2

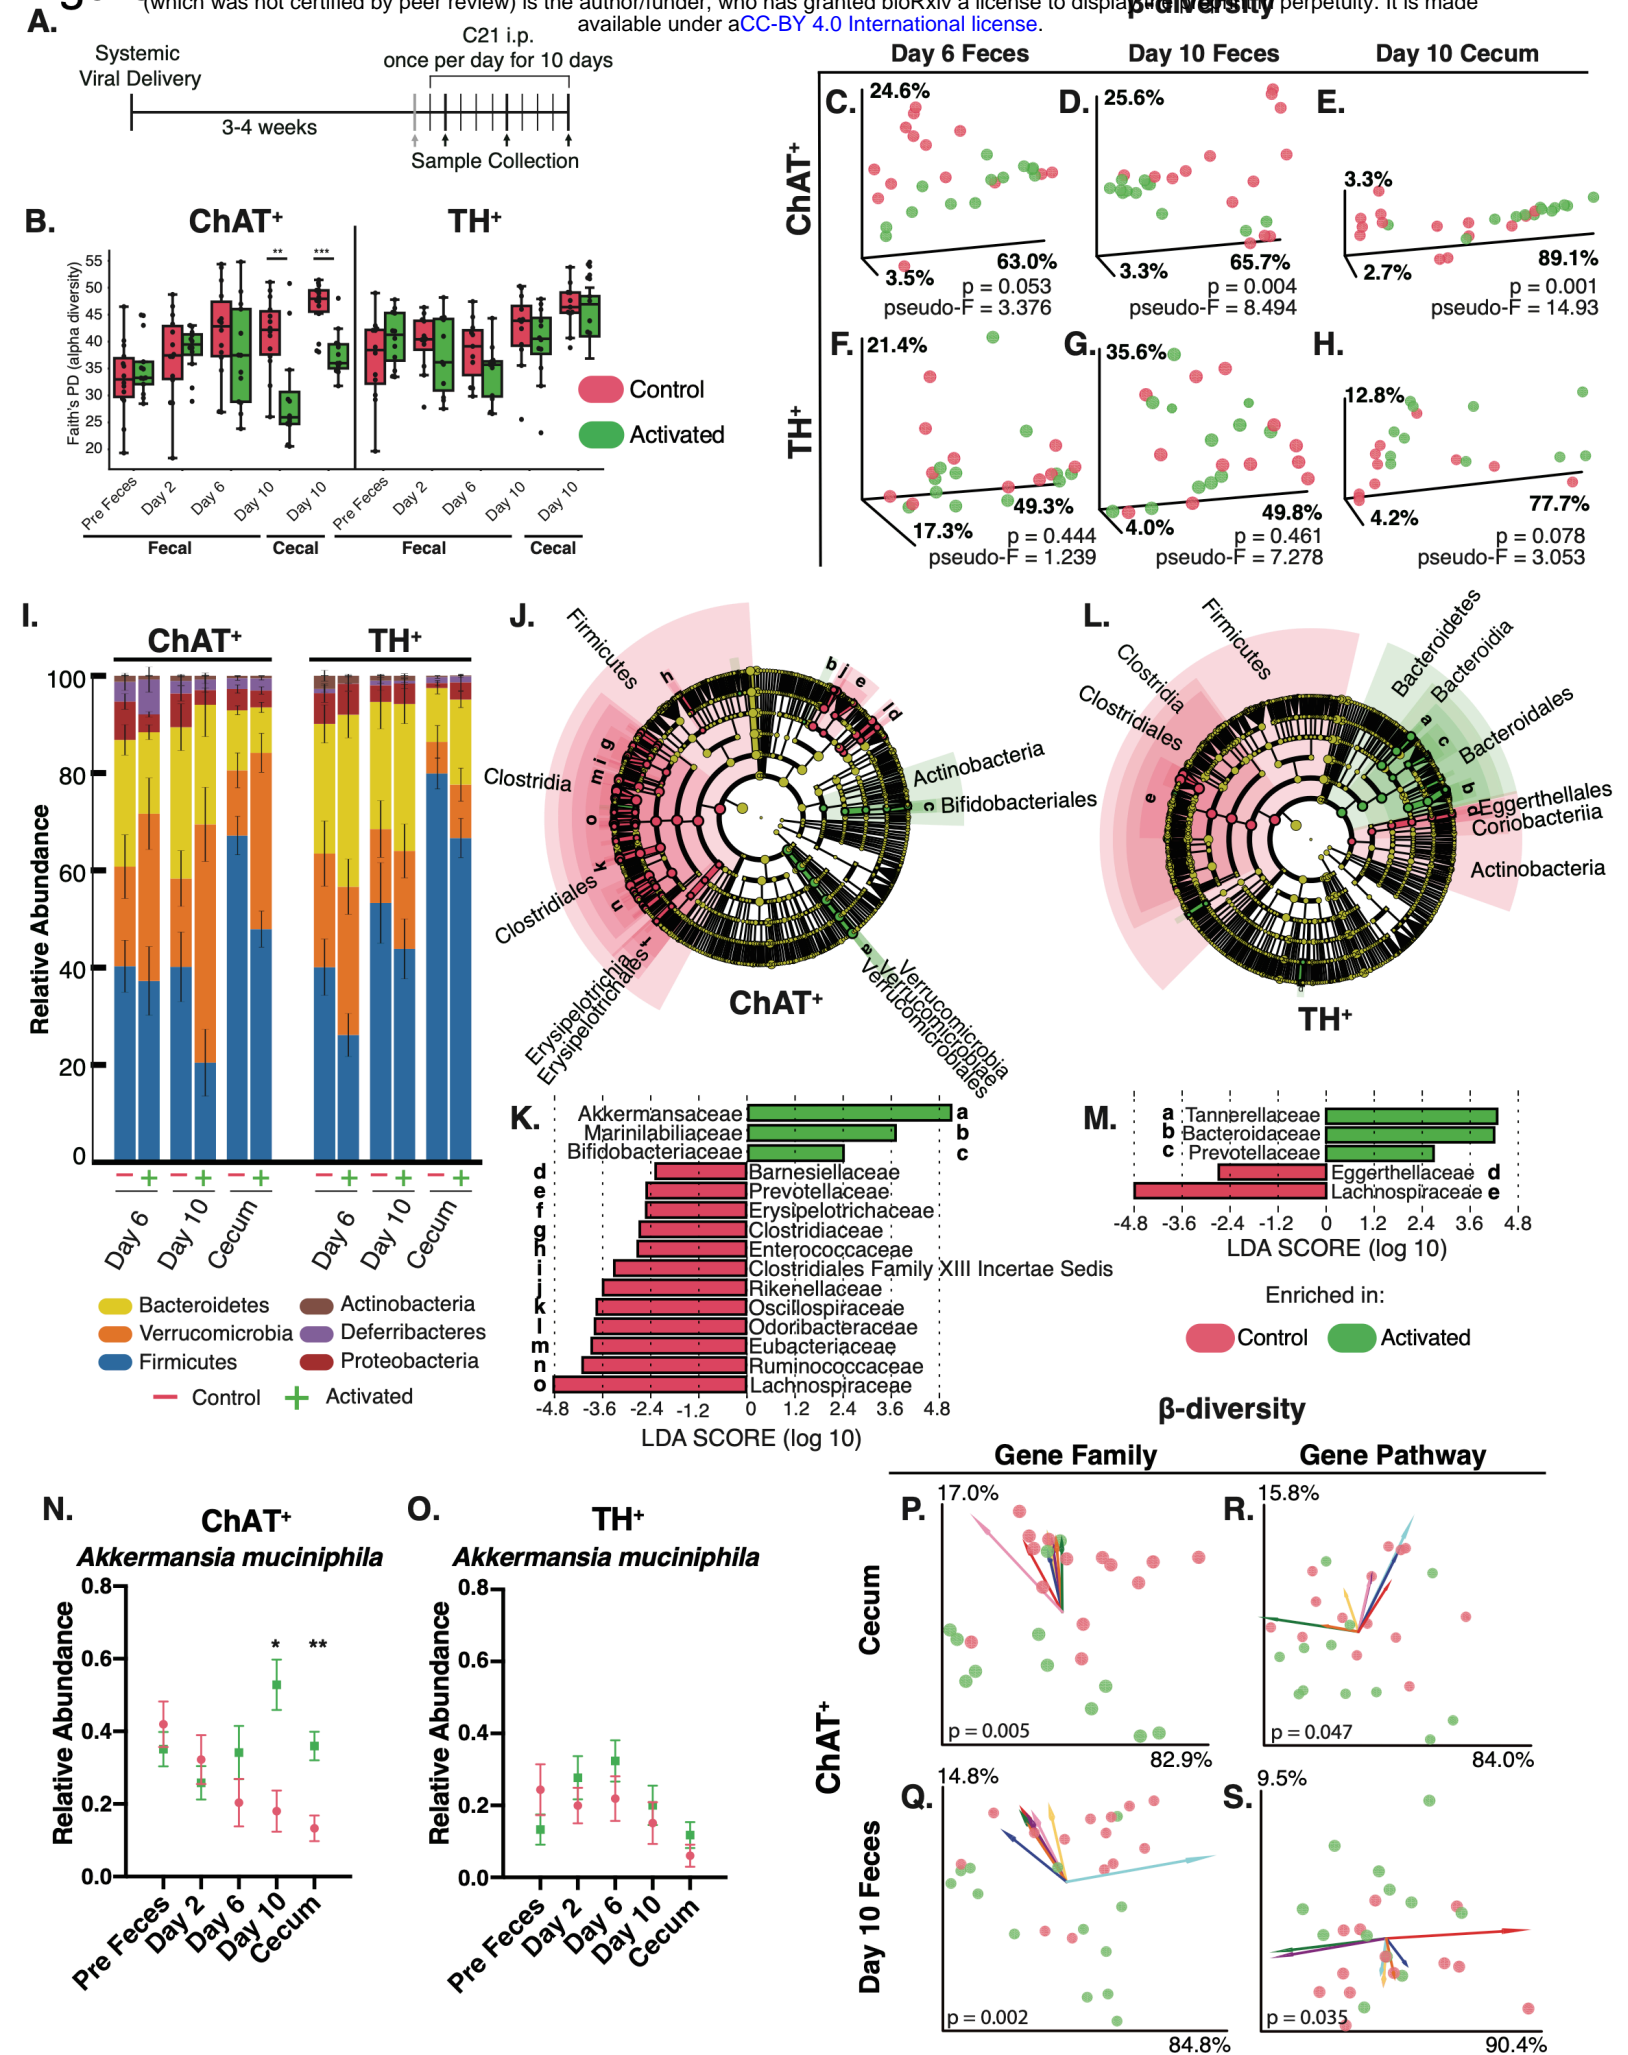

# Figure 3

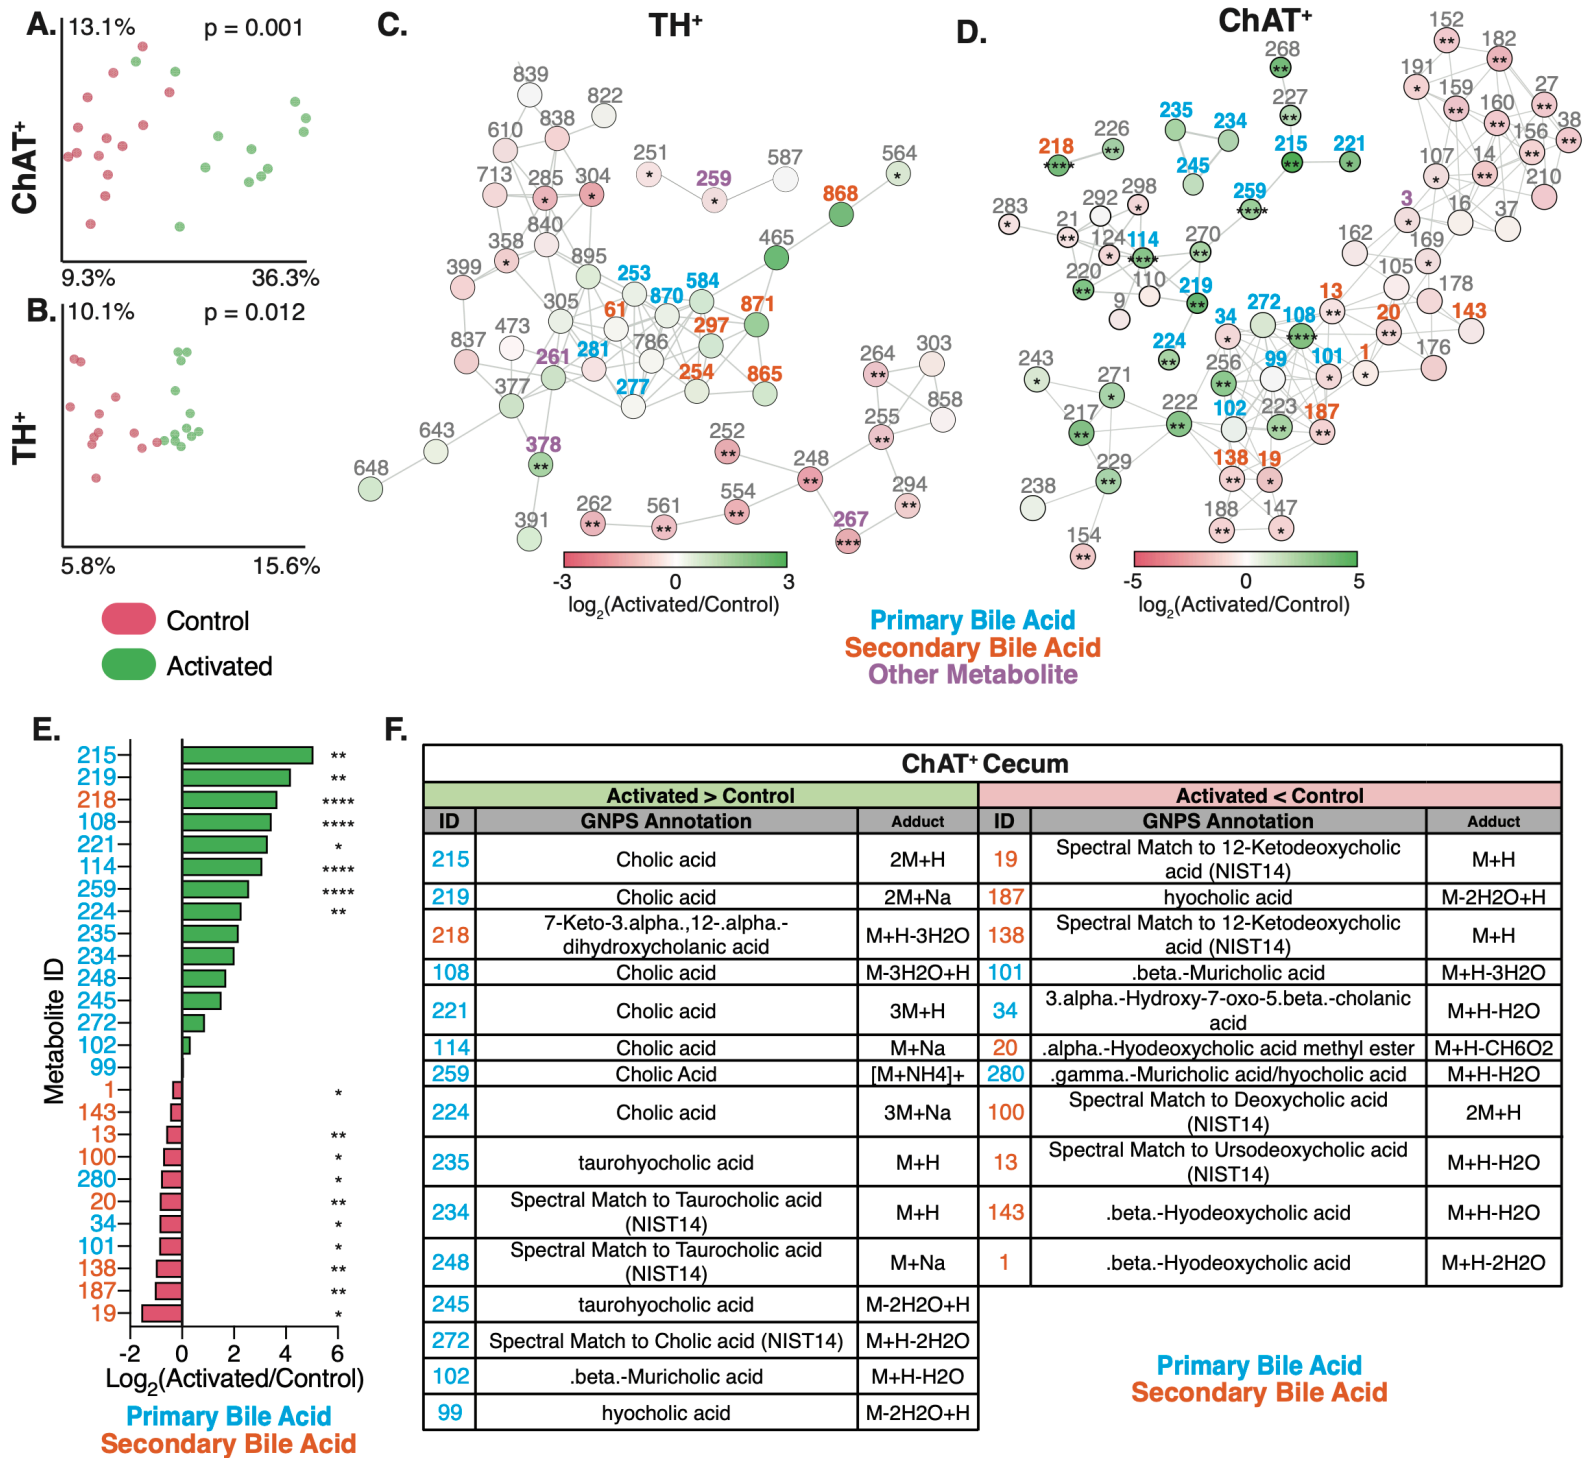

# Figure 4

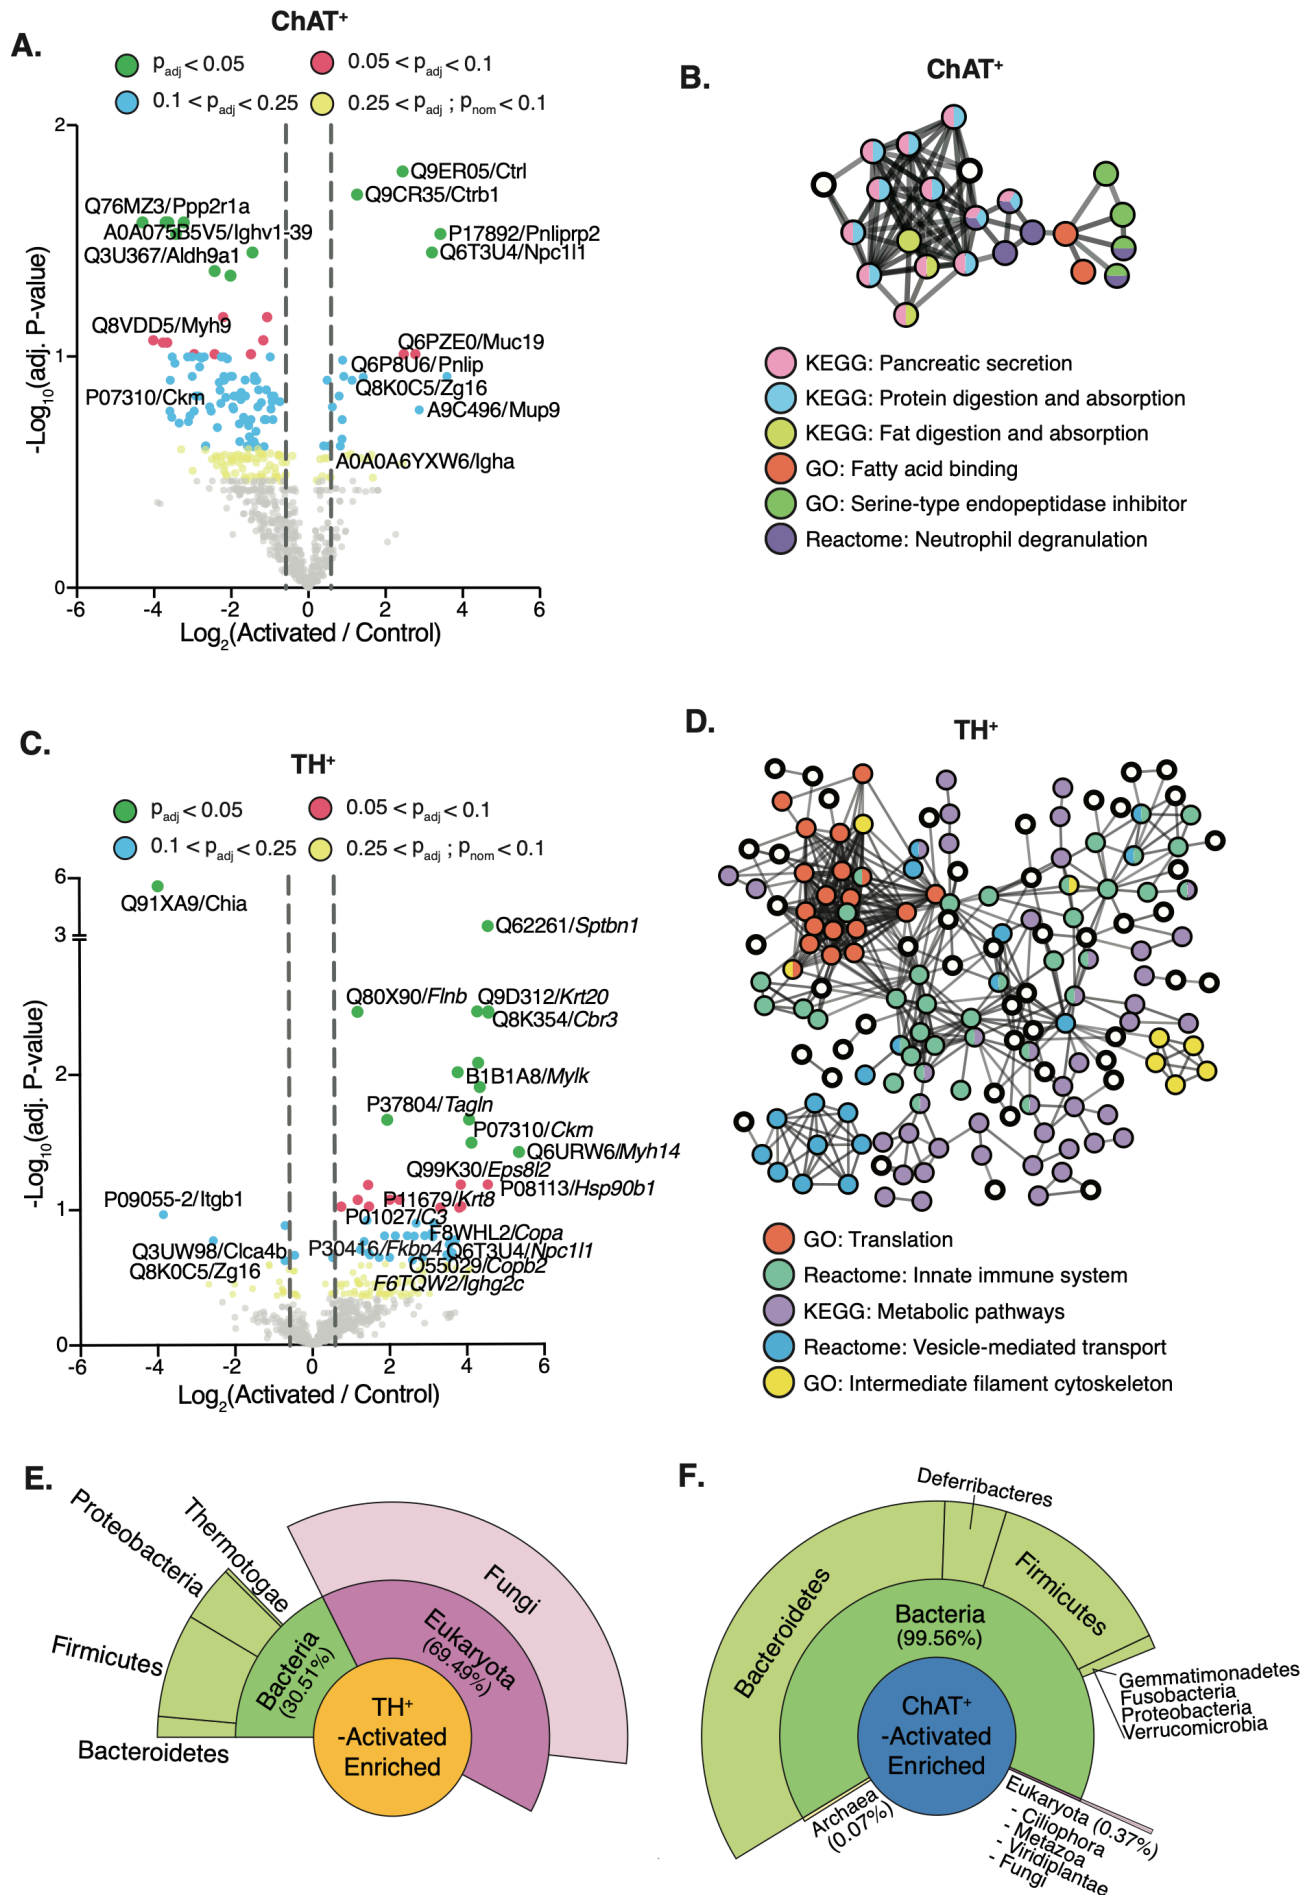

# Figure 5

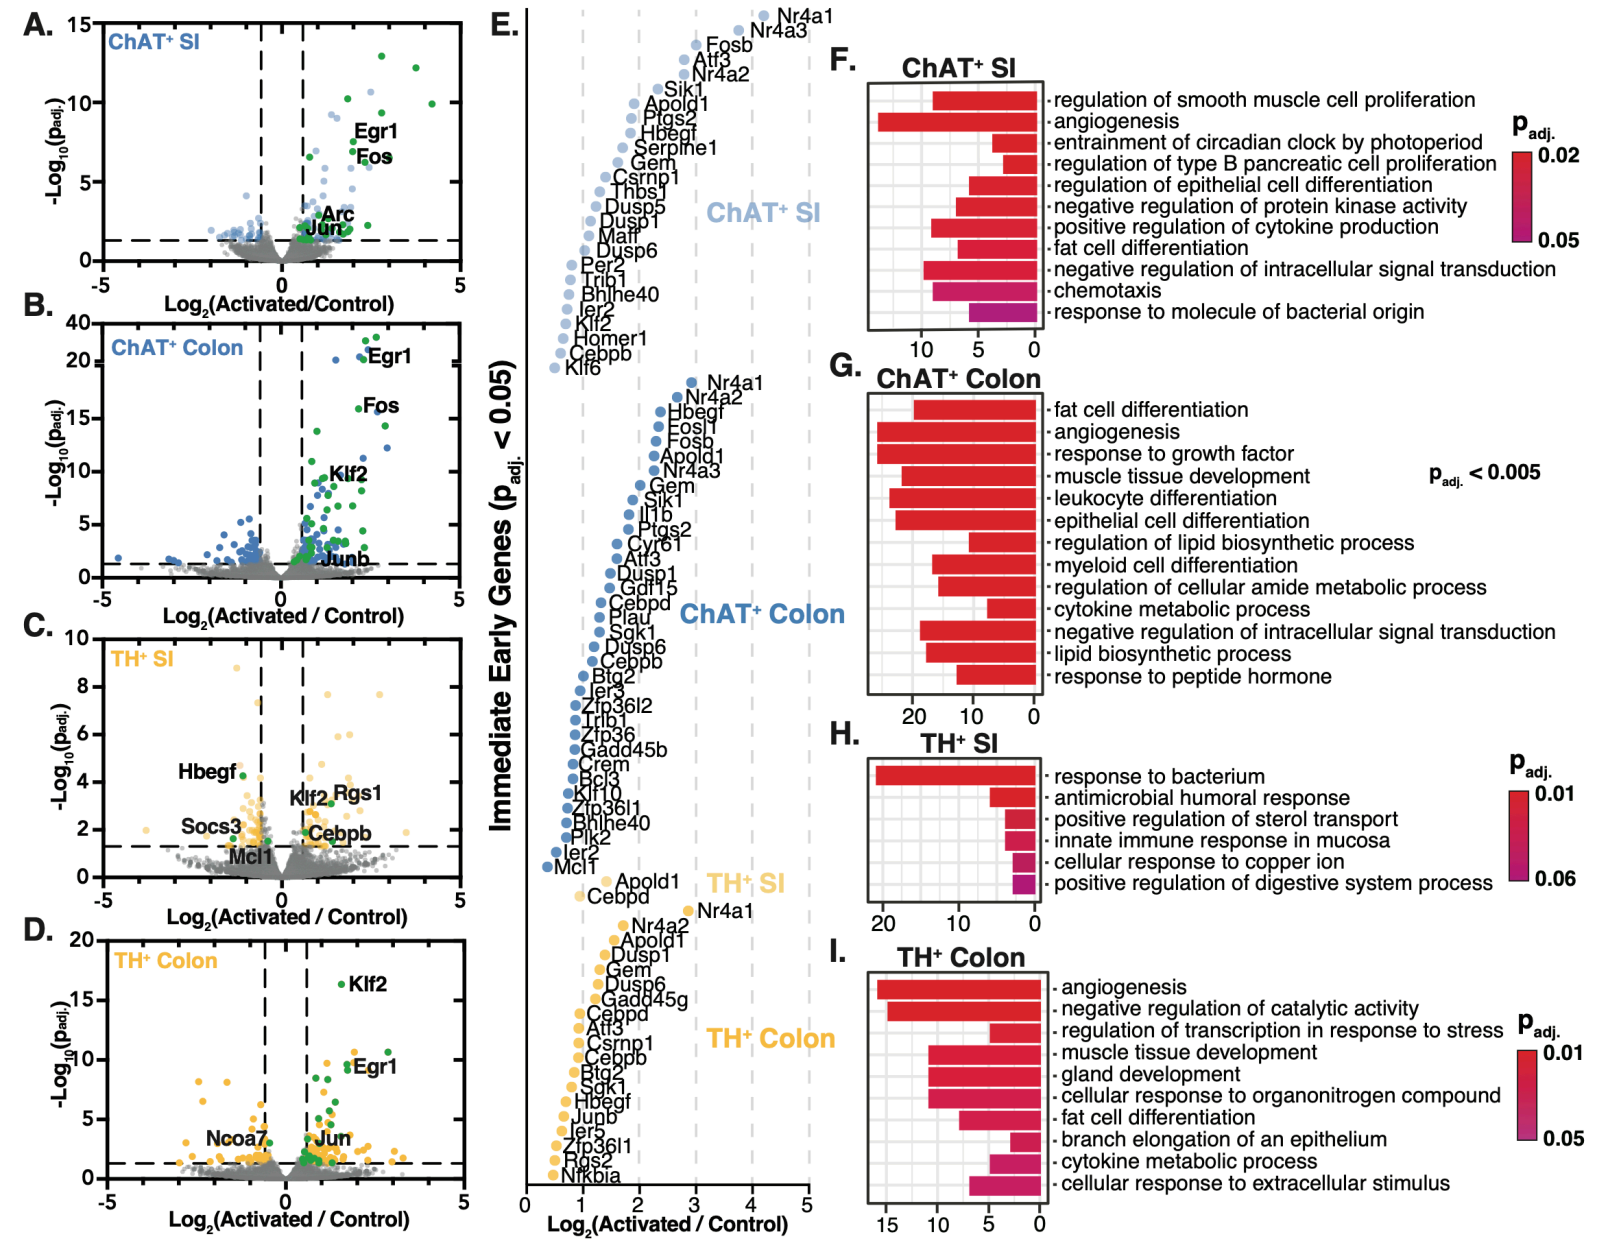



# Figure 6

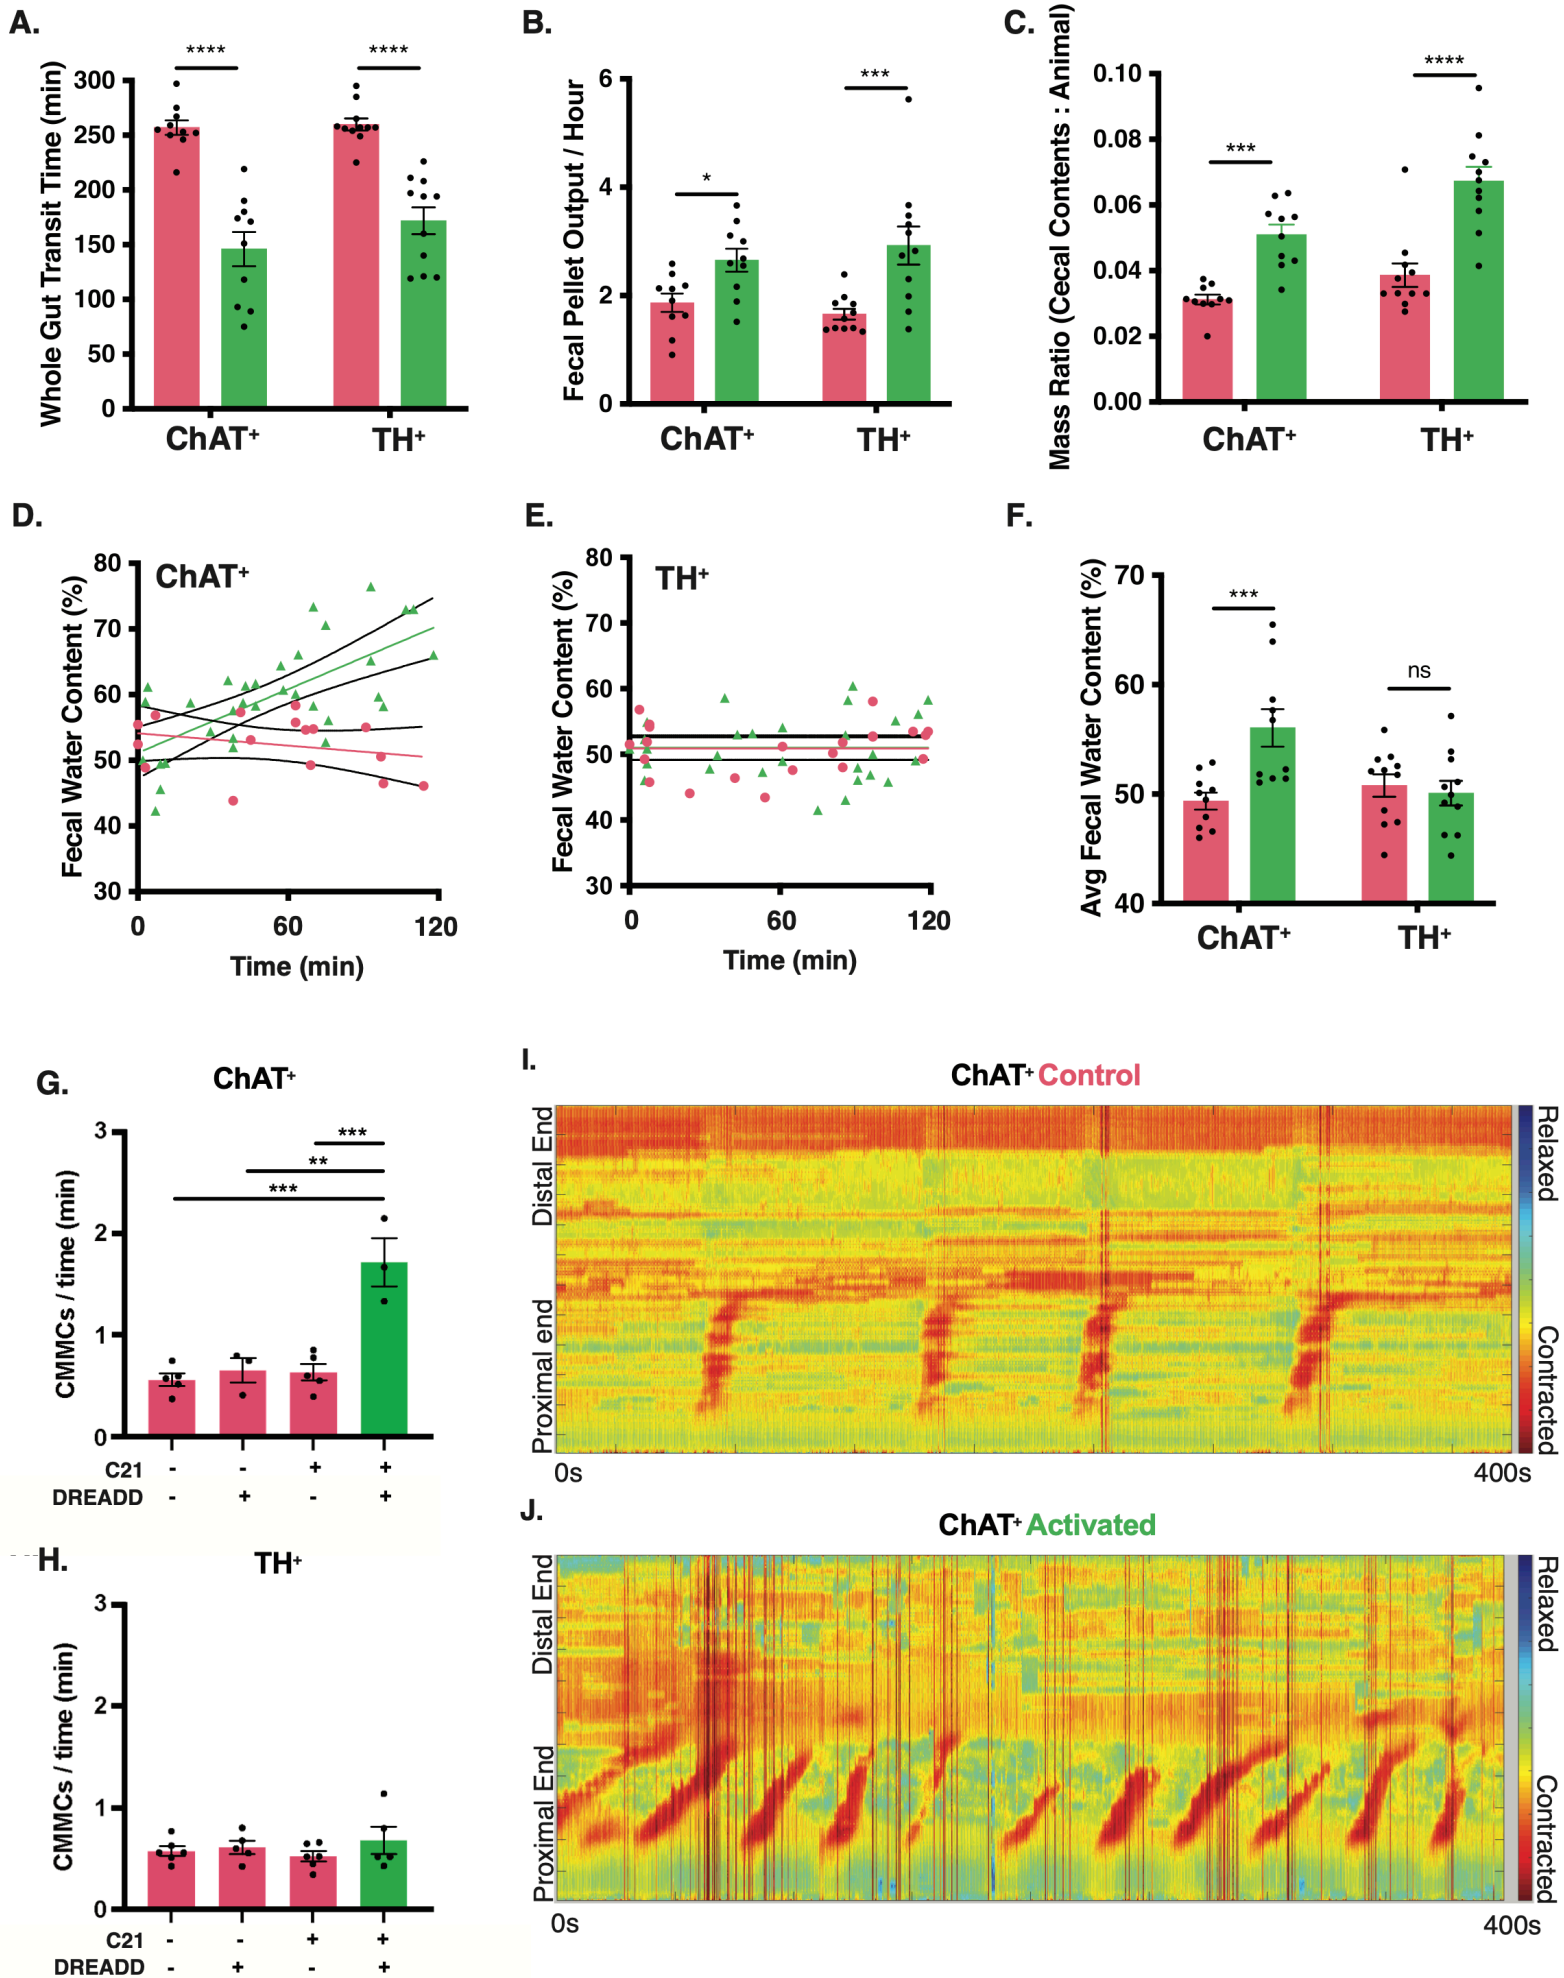

Source: http://biorxiv.org/content/10.1101/2021.04.12.439539v4.full.pdf
